# Supplementary material
Source: PubMed Central journal article supplement (PMC9929700)
Supplement: jama-e2224162-s001.pdf [file jama-e2224162-s001.pdf]

## Supplemental Online Content

Yam JC, Zhang XJ, Zhang Y, et al. Effect of Low-Concentration Atropine Eyedrops vs Placebo on Myopia Incidence in Children. *JAMA*. Published online February 14, 2023.

doi:10.1001/jama.2022.24162

eAppendix Table 1. Summary of Randomized Controlled Trials (RCTs) in Atropine for Myopia Control

eAppendix Table 2. Summary of Ongoing Randomized Controlled Trials (RCTs) in Atropine for Myopia Control

eAppendix References

eTable 1. Outdoor Time and Near Work over Two Years

eTable 2. Baseline Demographics and Clinical Characteristics in 0.05% Atropine, 0.01% Atropine and Placebo Groups for Those Who Completed 2 Years versus Those Who Did Not Complete 2 Years of Treatment

eTable 3. Dropout Rate and Compliance over Two Years

eTable 4. Association between Dropout and Baseline Characteristics

eTable 5. Comparison of Baseline and First Year Outcomes between Those Discontinued after the First Year and Those Completed Two Years

eTable 6. Myopia Incidence over Two Years Using Different Cut-off Points to Define Myopia

eTable 7. Myopia Incidence over Two Years (Including Those Who Had Become Myopic before Discontinuing Treatment)

eTable 8. Myopia Incidence over Two Years (Including the Missing Data for Those Who Had Missed the Follow-up Visit before 24-month but Had Completed Two Years)

eTable 9. Myopia Incidence over Two Years (Including the Missing Data for Those Who Missed the Follow-up or Discontinued Treatment)

eTable 10. Proportion with Fast Myopic Shift over Two Years Using Different Cut-off Points to Define Fast Myopic Shift

eTable 11. Proportion with Fast Myopic Shift over Two Years (Including the Missing Data for Those Who Missed the Follow-up or Discontinued Treatment)

eTable 12. Spherical Equivalent and Axial Length at Follow-Up Visits over Two years

eTable 13. Changes in Spherical Equivalent and Axial Length over Two Years Using the Right or Left Eyes

eTable 14. Changes in Accommodation, Pupil Diameter, and Visual Acuity over Two Years

eTable 15. Accommodation, Pupil Diameter, and Visual Acuity at Follow-Up Visits over Two years

eTable 16. Adverse Events over Two Years

eTable 17. Visual Function Questionnaire Scores over Two Years

eFigure 1. Bar Graph Showing the Distribution of the Various Rates of Spherical Equivalent Myopic Shifts over Two Years in the 0.05% Atropine, 0.01% Atropine and Placebo Groups

This supplemental material has been provided by the authors to give readers additional information about their work.

eAppendix Table 1. Summary of Randomized Controlled Trials (RCTs) in Atropine for Myopia Control

| Author (s), Year                                 | Area      | Follow-up, months | Sample Size | Age, years   | Arms and Treatments               | Baseline Spherical Equivalent, D | Baseline Axial Length, mm | Change in Spherical Equivalent, D | Change in Axial Length, mm |
|--------------------------------------------------|-----------|-------------------|-------------|--------------|-----------------------------------|----------------------------------|---------------------------|-----------------------------------|----------------------------|
| Yen, MY. et al, 1989 <sup>1</sup>                | Taiwan    | 12                | 96          | 6 to 14      |                                   | -0.5 to -4.0 D                   |                           |                                   |                            |
|                                                  |           |                   | 32          | 10.5         | 1 % Atropine                      | -1.52 (0.96)                     | NA                        | -0.22 (0.54) D/year               | NA                         |
|                                                  |           |                   | 32          | 10.0         | 1% Cyclopentolate                 | -1.45 (0.85)                     | NA                        | -0.58 (0.49) D/year               | NA                         |
|                                                  |           |                   | 32          | 10.4         | Placebo                           | -1.59 (0.92)                     | NA                        | -0.91 (0.58) D/year               | NA                         |
| Shih, YF. et al, 1999 <sup>2</sup>               | Taiwan    | 24                | 200         | 6 to 13      |                                   | -0.5 to -7.0 D                   |                           |                                   |                            |
|                                                  |           |                   | 41          | 9.8          | 0.5 % Atropine                    | -4.89 (2.06)                     | NA                        | -0.04 (0.63) D/year               | NA                         |
|                                                  |           |                   | 47          | 9.7          | 0.25 % Atropine                   | -4.24 (1.74)                     | NA                        | -0.45 (0.55) D/year               | NA                         |
|                                                  |           |                   | 49          | 8.9          | 0.1 % Atropine                    | -4.41 (1.47)                     | NA                        | -0.47 (0.91) D/year               | NA                         |
|                                                  |           |                   | 49          | 8.3          | 0.5% Tropicamide                  | -4.50 (1.86)                     | NA                        | -1.06 (0.61) D/year               | NA                         |
| Shih, YF. et al, 2001 <sup>3</sup>               | Taiwan    | 18                | 227         | 6 to 13      |                                   |                                  |                           |                                   |                            |
|                                                  |           |                   | 76          | N/A          | 0.5 % Atropine+multi-focal lenses | -3.20 (0.14)                     | 24.75 (0.10)              | -0.41 (0.07) D/year               | 0.22 (0.03) mm/year        |
|                                                  |           |                   | 75          | N/A          | Multi-focal lenses                | -3.34 (0.14)                     | 24.80 (0.09)              | -1.19 (0.07) D/year               | 0.49 (0.03) mm/year        |
|                                                  |           |                   | 76          | N/A          | Single vision spectacles          | -3.28 (0.13)                     | 24.62 (0.10)              | -1.40 (0.09) D/year               | 0.59 (0.04) mm/year        |
| Chua, WH. et al, 2006 (ATOM1 study) <sup>4</sup> | Singapore | 24                | 400         | 6 to 12      |                                   | -1.0 D to -6.0 D                 |                           |                                   |                            |
|                                                  |           |                   | 200         | 9.2          | 1 % Atropine treated              | -3.36 (1.38)                     | 24.80 (0.83)              | -0.28 (0.92) D/2year              | -0.02 (0.35) D/2year       |
|                                                  |           |                   |             |              | 1 % Atropine untreated            | -3.40 (1.35)                     | 24.81 (0.84)              |                                   |                            |
|                                                  |           |                   | 200         | 9.2          | Placebo treated                   | -3.58 (1.17)                     | 24.80 (0.84)              | -1.20 (0.69) D/2year              | 0.38 (0.38) D/2year        |
|                                                  |           |                   |             |              | Placebo untreated                 | -3.55 (1.21)                     | 24.76 (0.86)              |                                   |                            |
| Liang, CK. et al, 2008 <sup>5</sup>              | Taiwan    | 8.28 ± 2.48       | 71          | 6 to 15      |                                   | -0.5 D or less                   |                           |                                   |                            |
|                                                  |           |                   | 23          | 10.91 (2.43) | 0.5 % Atropine                    | -2.17 (1.48)                     | 24.11 (0.89)              | -0.15 (0.15) D/year               | NA                         |
|                                                  |           |                   | 22          | 9.91 (2.11)  | 0.25 % Atropine                   | -2.09 (1.68)                     | 24.24 (0.53)              | -0.38 (0.32) D/year               | NA                         |
|                                                  |           |                   | 26          | 10.23 (1.66) | 0.25 % Atropine+acupoints         | -1.91 (1.20)                     | 23.95 (0.77)              | -0.21 (0.23) D/year               | NA                         |
| Chia, A. et al, 2012 (ATOM2 study) <sup>6</sup>  | Singapore | 24                | 400         | 6 to 12      |                                   | -2.0 D or less                   |                           |                                   |                            |
|                                                  |           |                   | 161         | 9.70 (1.5)   | 0.5 % Atropine                    | -4.7 (1.8)                       | 25.2 (0.9)                | -0.30 (0.60) D/2year              | 0.27 (0.25) mm/2year       |
|                                                  |           |                   | 155         | 9.70 (1.6)   | 0.1 % Atropine                    | -4.8 (1.5)                       | 25.2 (0.8)                | -0.38 (0.60) D/2year              | 0.28 (0.28)                |

|                                                |           |    |     |              |                                           |                  |              |                     |                      |
|------------------------------------------------|-----------|----|-----|--------------|-------------------------------------------|------------------|--------------|---------------------|----------------------|
|                                                |           |    |     |              |                                           |                  |              |                     | mm/year              |
|                                                |           |    | 84  | 9.50 (1.5)   | 0.01 % Atropine                           | -4.5 (1.5)       | 25.1 (1.0)   | -0.49 (0.63) D/year | 0.41 (0.32) mm/year  |
| Yi, S. et al, 2015 <sup>7</sup>                | China     | 12 | 132 | 7 to 12      |                                           | -0.5 to -2.0 D   |              |                     |                      |
|                                                |           |    | 68  | 9.91 (1.36)  | 1 % Atropine                              | -1.23 (0.32)     | 23.75 (0.10) | 0.32 (0.22) D/year  | -0.03 (0.07) mm/year |
|                                                |           |    | 64  | 9.72 (1.40)  | Placebo                                   | -1.15 (0.30)     | 23.72 (0.12) | -0.85 (0.31) D/year | 0.32 (0.15) mm/year  |
| Wang, YR. et al, 2017 <sup>8</sup>             | China     | 12 | 126 | 5 to 10      |                                           | -0.5 to -2.0 D   |              |                     |                      |
|                                                |           |    | 63  | 9.1 (1.4)    | 0.5 % Atropine                            | -1.3 (0.4)       | 24.1 (1.0)   | -0.8 D/year         | 23.0 mm at 1 year    |
|                                                |           |    | 63  | 8.7 (1.5)    | Placebo                                   | -1.2 (0.3)       | 23.8 (0.9)   | -2.0 D/year         | 24.3 mm at 1 year    |
| Yam, JC. et al, 2019 (LAMP study) <sup>9</sup> | Hong Kong | 12 | 438 | 4 to 12      |                                           | -1.0 D or less   |              |                     |                      |
|                                                |           |    | 109 | 8.45 (1.81)  | 0.05% Atropine                            | -3.98 (1.69)     | 24.85 (0.90) | -0.27 (0.61) D/year | 0.20 (0.25) mm/year  |
|                                                |           |    | 108 | 8.54 (1.71)  | 0.025% Atropine                           | -3.71 (1.85)     | 24.86 (0.95) | -0.46 (0.45) D/year | 0.29 (0.20) mm/year  |
|                                                |           |    | 110 | 8.23 (1.83)  | 0.01% Atropine                            | -3.77 (1.85)     | 24.70 (0.99) | -0.59 (0.61) D/year | 0.36 (0.29) mm/year  |
|                                                |           |    | 111 | 8.42 (1.72)  | Placebo                                   | -3.85 (1.95)     | 24.82 (0.97) | -0.81 (0.53) D/year | 0.41 (0.22) mm/year  |
| Fu, A. et al, 2020 <sup>10</sup>               | China     | 12 | 336 | 6-14         |                                           | -1.25 to -6.00D  |              |                     |                      |
|                                                |           |    | 117 | 9.40 (1.80)  | 0.02% Atropine                            | -2.76 (1.47)     | 24.60 (0.72) | -0.38 (0.35)        | 0.30 (0.21)          |
|                                                |           |    | 119 | 9.30 (1.90)  | 0.01% Atropine                            | -2.70 (1.64)     | 24.58 (0.74) | -0.47 (0.45)        | 0.37 (0.22)          |
|                                                |           |    | 100 | 9.50 (1.40)  | Control group                             | -2.68 (1.42)     | 24.55 (0.71) | -0.70 (0.60)        | 0.46 (0.35)          |
| Kinoshita, N. et al, 2020 <sup>11</sup>        | Japan     | 24 | 73  | 8-12         |                                           | -1.0 D to -6.0 D |              |                     |                      |
|                                                |           |    | 38  | 10.33 (1.59) | OK and 0.01% atropine ophthalmic solution | -2.60 (1.29)     | 24.69 (0.58) | NA                  | 0.29 (0.20)          |
|                                                |           |    | 35  | 10.37 (1.65) | OK                                        | -2.72 (1.31)     | 24.86 (0.81) | NA                  | 0.40 (0.23)          |
| Tan, Q. et al, 2020 <sup>12</sup>              | Hong Kong | 12 | 59  | 6-11         |                                           | -1.0 D to -4.0 D |              |                     |                      |
|                                                |           |    | 29  | 9.0 (1.2)    | 0.01% Atropine with ortho-k (AOK)         | -2.65 (0.92)     | 24.43 (0.62) | 2.95 (1.00)         | 0.07 (0.16)          |
|                                                |           |    | 30  | 9.0 (1.2)    | Ortho-k alone (OK)                        | -2.84 (0.96)     | 24.43 (0.81) | 2.87 (0.97)         | 0.16 (0.15)          |
| Wei, S. et al, 2020 <sup>13</sup>              | China     | 12 | 220 | 6-12         |                                           | -1.0 D to -6.0 D |              |                     |                      |
|                                                |           |    | 110 | 9.44 (1.80)  | 0.01% Atropine                            | -2.52 (1.33)     | 24.50 (0.76) | -0.49 (0.42)        | 0.32 (0.19)          |
|                                                |           |    | 110 | 9.84 (1.53)  | Placebo                                   | -2.64 (1.46)     | 24.69 (0.97) | -0.76 (0.50)        | 0.41 (0.19)          |

|                                                |           |    |     |              |                                     |                   |              |              |              |
|------------------------------------------------|-----------|----|-----|--------------|-------------------------------------|-------------------|--------------|--------------|--------------|
| Ye, L.et al, 2020 <sup>14</sup>                | China     | 6  | 185 | 6-12         |                                     | -1.0 D to -3.0 D  |              |              |              |
|                                                |           |    | 98  | 8.94 (1.55)  | 1% Atropine                         | -2.12 (1.09)      | 24.34 (0.82) | 0.28 (0.37)  | -0.03 (0.12) |
|                                                |           |    | 87  | 8.84 (1.65)  | 0.01% Atropine                      | -2.16 (1.10)      | 24.27 (0.74) | -0.27 (0.34) | 0.19 (0.12)  |
| Zhao, Q.et al, 2021 <sup>15</sup>              | China     | 12 | 80  | 5-14         |                                     | -1.0 D to -3.0 D  |              |              |              |
|                                                |           |    | 20  | 9.7 (1.49)   | Spectacles                          | -1.93 (0.74)      | 24.28 (0.83) | -1.30 (0.44) | 0.72 (0.21)  |
|                                                |           |    | 20  | 9.65 (1.53)  | Spectacles with 0.01% atropine      | -1.98 (0.45)      | 24.17 (0.68) | -0.34 (0.16) | 0.24 (0.12)  |
|                                                |           |    | 20  | 11.00 (1.17) | Orthokeratology                     | -2.75 (0.46)      | 24.42 (0.48) | -0.33 (0.16) | 0.29 (0.11)  |
|                                                |           |    | 20  | 10.9 (1.29)  | Orthokeratology with 0.01% atropine | -2.85 (0.45)      | 24.56 (0.39) | -0.15 (0.08) | 0.14 (0.08)  |
| Moriche-Carretero, M.et al, 2021 <sup>16</sup> | Spain     | 24 | 339 | 5-11         |                                     | -1.0 D to -4.0 D  |              |              |              |
|                                                |           |    | 168 | 7.24 (1.77)  | Control                             | -2.16 (0.62)      | 24.26 (0.91) | -0.76 (0.37) | 0.37 (0.27)  |
|                                                |           |    | 171 | 7.37 (1.54)  | 0.01% Atropine                      | -2.13 (0.63)      | 24.22 (0.66) | -0.51 (0.39) | 0.20 (0.20)  |
| Saxena, R.et al, 2021 <sup>17</sup>            | India     | 12 | 102 | 6-14         |                                     | -0.5D to -6.0 D   |              |              |              |
|                                                |           |    | 47  | 10.6 (2.2)   | 0.01% Atropine                      | -3.45 (1.3)       | 24.62 (0.98) | -0.16 (0.38) | 0.22 (0.20)  |
|                                                |           |    | 45  | 10.8 (2.2)   | Placebo                             | -3.68 (1.3)       | 24.70 (0.74) | -0.35 (0.4)  | 0.28 (0.28)  |
| Hieda, O.et al, 2021 <sup>18</sup>             | Japan     | 24 | 168 | 6-12         |                                     | -1.0 D to -6.0 D  |              |              |              |
|                                                |           |    | 84  | 8.99 (1.44)  | 0.01% Atropine                      | -2.91             | 24.43        | -1.26        | 0.63         |
|                                                |           |    | 84  | 8.98 (1.50)  | Placebo                             | -2.98             | 24.51        | -1.48        | 0.77         |
| Zhao, Q.et al, 2021 <sup>19</sup>              | China     | 12 | 120 | 8-10         |                                     | At least -1.0 D   |              |              |              |
|                                                |           |    |     |              | Spectacles and 0.01% atropine       | -5.82 (0.76)      | 27.03 (0.58) | -0.38 (0.09) | 0.29 (0.08)  |
|                                                |           |    |     |              | Orthokeratology                     | -5.97 (0.72)      | 27.12 (0.57) | -0.35 (0.10) | 0.24 (0.08)  |
| Hao, Q.et al, 2021 <sup>20</sup>               | China     | 12 | 75  | 8-12         |                                     | -1.0 D to -6.0 D  |              |              |              |
|                                                |           |    | 22  |              | Spectacles and 0.01% atropine       | -3.62 (0.57)      | 24.91 (0.61) | NA           | 0.20 (0.03)  |
|                                                |           |    | 24  |              | OK                                  | -3.66 (0.60)      | 25.17 (0.52) | NA           | 0.28 (0.03)  |
|                                                |           |    | 21  |              | OK and 0.01% atropine               | -4.07 (0.74)      | 25.29 (0.56) | NA           | 0.14 (0.03)  |
| Cui, C.et al, 2021 <sup>21</sup>               | China     | 24 | 300 | 6-14         |                                     | -1.25D to -6.00 D |              |              |              |
|                                                |           |    | 105 |              | 0.02% Atropine                      | -2.81 (1.47)      | 24.61 (0.69) | -0.03        | 0.03         |
|                                                |           |    | 106 |              | 0.01% Atropine                      | -2.76 (1.56)      | 24.60 (0.72) | -0.04        | 0.03         |
|                                                |           |    | 89  |              | Single-vision spectacles            | -2.66 (1.39)      | 24.54 (0.69) | -0.06        | 0.04         |
| Lee, SS.et al, 2022 <sup>22</sup>              | Australia | 24 | 153 | 9-14         |                                     | Less than -1.50 D |              |              |              |
|                                                |           |    | 49  | 12.2 (2.5)   | Placebo                             | -3.56             | 24.7         | -0.78        | 0.38         |
|                                                |           |    | 104 | 11.2 (2.7)   | Atropine 0.01%                      | -3.13             | 24.6         | -0.64        | 0.34         |

|                                      |           |    |     |      |                                 |                  |              |              |             |
|--------------------------------------|-----------|----|-----|------|---------------------------------|------------------|--------------|--------------|-------------|
| Jethani, J.et al, 2022 <sup>23</sup> | India     | 24 | 60  | 4-12 |                                 | Less than +1.0 D |              |              |             |
|                                      |           |    | 30  |      | 0.01% Atropine                  | NA               | 20.8 (0.6)   | -0.31 (0.3)  | 0.12 (0.1)  |
|                                      |           |    | 30  |      | Control                         | NA               | 21.0 (0.5)   | -0.76 (0.4)  | 0.21 (0.2)  |
| Chan, HHL.et al, 2022 <sup>24</sup>  | Hong Kong | 18 | 61  | 7-10 |                                 | -0.5 D to -5.0 D |              |              |             |
|                                      |           |    |     |      | 0.01% Atropine                  | -1.88 (1.08)     | 24.17 (0.79) | -0.70 (0.39) | 0.32 (0.16) |
|                                      |           |    |     |      | Placebo                         | -1.74 (0.71)     | 24.09 (0.74) | -0.66 (0.41) | 0.30 (0.22) |
| Sen, S.et al, 2022 <sup>25</sup>     | India     | 24 | 145 | 5-15 |                                 | More than -2.0 D |              |              |             |
|                                      |           |    | 72  |      | Atropine 0.01%                  | -4.26            | 24.61        | 0.33         | 0.12        |
|                                      |           |    | 73  |      | Placebo                         | -4.98            | 24.86        | 0.89         | 0.31        |
| Chen, Y.et al, 2022 <sup>26</sup>    | China     | 12 | 62  | 7-15 |                                 | At least -1.0 D  |              |              |             |
|                                      |           |    | 31  |      | Repeated low-level red light    | -2.60 (1.17)     | 24.48 (0.79) | -0.03        | 0.08        |
|                                      |           |    | 31  |      | 0.01% Atropine eye drops        | -2.59 (1.24)     | 24.67 (0.98) | -0.60        | 0.33        |
| Yu, S.et al, 2022 <sup>27</sup>      | China     | 12 | 53  | 8-12 |                                 | -1.0 D to -4.0 D |              |              |             |
|                                      |           |    | 27  |      | OK and 0.01% atropine eye drops | -2.81 (0.92)     | 24.79 (0.72) | NA           | 0.10 (0.14) |
|                                      |           |    | 26  |      | OK and placebo                  | -2.81 (0.97)     | 24.64 (0.79) | NA           | 0.20 (0.15) |

Mean (SD) showed in this Table. Abbreviations: OK, Orthokeratology; NA, not available.

eAppendix Table 2. Summary of Ongoing Randomized Controlled Trials (RCTs) in Atropine for Myopia Control <sup>a</sup>

| Investigator (s), year        | Area      | Follow-up, months | Sample Size | Age, years | Arms and Interventions                                                                                                                                                              |
|-------------------------------|-----------|-------------------|-------------|------------|-------------------------------------------------------------------------------------------------------------------------------------------------------------------------------------|
| Repka, X. et al, 2017         | USA       | 30                | 187         | 5-12       |                                                                                                                                                                                     |
|                               |           |                   |             |            | 1. 0.01% Atropine eyedrops<br>2. Placebo                                                                                                                                            |
| Chia, A. et al, 2017          | Singapore | 40                | 571         | 5-9        |                                                                                                                                                                                     |
|                               |           |                   |             |            | 1. Premyopia Group: Active Comparator: Atropine<br>2. 0.01%/Placebo Comparator: Placebo<br>3. Low myopia Group: Active Comparator: Atropine<br>4. 0.01%/Placebo Comparator: Placebo |
| Ganesh, A. et al, 2018        | Oman      | 36                | 150         | 6-15       |                                                                                                                                                                                     |
|                               |           |                   |             |            | 1. Atropine Sulfate 0.01% Eye Drops<br>2. Control                                                                                                                                   |
| Zhu, JF. et al, 2019          | China     | 12                | 222         | 7-12       |                                                                                                                                                                                     |
|                               |           |                   |             |            | 1. Atropine Sulfate 1 % Ophthalmic<br>2. Ointment and Atropine Sulfate<br>3. 0.01% Eye Drop<br>4. Atropine 0.01% eye drop                                                           |
| Azuara-Blanco, A. et al, 2019 | UK        | 24                | 289         | 6-12       |                                                                                                                                                                                     |
|                               |           |                   | 193         |            | 1. Atropine 0.01%                                                                                                                                                                   |
|                               |           |                   | 96          |            | 2. Placebo                                                                                                                                                                          |
| Sankaridurg, P. et al, 2019   | Vietnam   | 24                | 112         | 6-13       |                                                                                                                                                                                     |
|                               |           |                   |             |            | 1. BHVI1 (atropine) eye drops                                                                                                                                                       |
|                               |           |                   |             |            | 2. BHVI2 (atropine) eye drops                                                                                                                                                       |
|                               |           |                   |             |            | 3. Combination of BHVI1 and BHVI2 eye drops<br>4. Non-randomized control: single-vision spectacles                                                                                  |
| Kessel, L. et al, 2019        | Denmark   | 36                | 97          | 6-12       |                                                                                                                                                                                     |
|                               |           |                   |             |            | 1. 0.1% Atropine and 0.01% atropine<br>2. 0.01% Atropine                                                                                                                            |
|                               |           |                   |             |            | 3. 0.9% Sodium-chloride                                                                                                                                                             |
| Sydnexis, Inc. 2019           | USA       | 36                | 852         | 3-14       |                                                                                                                                                                                     |
|                               |           |                   |             |            | 1. SYD-101 (atropine) Dose 1<br>2. SYD-101 (atropine) Dose 2                                                                                                                        |
|                               |           |                   |             |            | 3. Placebo                                                                                                                                                                          |
| Donatello, D. et al, 2019     | USA       | 36                | 420         | 3-12       |                                                                                                                                                                                     |
|                               |           |                   |             |            | 1. Atropine 0.1% Ophthalmic Solution                                                                                                                                                |

|                        |         |    |     |      |                                                                                                                                                                                                                                            |
|------------------------|---------|----|-----|------|--------------------------------------------------------------------------------------------------------------------------------------------------------------------------------------------------------------------------------------------|
|                        |         |    |     |      | 2. Atropine 0.01% Ophthalmic Solution<br>3. Placebo Ophthalmic Solution                                                                                                                                                                    |
| Sauer, A.et al, 2020   | France  | 12 | 160 | 4-12 | 1. Atropine 0.01%<br>2. Placebo                                                                                                                                                                                                            |
| Zhu, JF.et al, 2021    | China   | 24 | 186 | 8-15 | 1. Atropine Sulfate 0.01% Eye Drop<br>2. Atropine Sulfate 0.04% Eye Drop<br>3. Orthokeratology                                                                                                                                             |
| Xu, X.et al, 2021      | China   | 36 | 357 | 6-12 | 1. 0.01% Atropine<br>2. 0.04% Atropine<br>3. 0.1% Atropine                                                                                                                                                                                 |
| Martin, G.et al, 2021  | France  | 24 | 242 | 4-14 | 1. Defocus Incorporated Multiple Segments® lenses<br>3. Atropine 0.05% eyedrops and Monofocal lenses                                                                                                                                       |
| Lagrèze, W.et al, 2021 | Germany | 36 | 300 | 8-12 | Year 1: Intervention: atropine 0.02%<br>Control: placebo<br>Year 2: Intervention: atropine 0.02%<br>Control: atropine 0.01%<br>Year 3: Intervention: placebo<br>Control: atropine 0.01%                                                    |
| Lane, K.et al, 2021    | USA     | 48 | 678 | 3-15 | 1. Atropine Sulfate 0.01% Ophthalmic Solution through year 4<br>2. Atropine Sulfate 0.01% Ophthalmic Solution through year 3 followed by placebo for 1 year<br>3. Placebo (Investigational Product minus active ingredient) through year 4 |
| Xu, Y.et al, 2022      | China   | 12 | 192 | 6-12 | 1% Atropine “5+3”<br>1% Atropine weekly                                                                                                                                                                                                    |
| Zhou, P.et al, 2022    | China   | 12 | 100 | 8-18 | Low-dose(0.01% and 0.02%) atropine eye drops<br>Orthokeratology                                                                                                                                                                            |
| Huang, JN.et           | China   | 12 | 104 | 6-12 |                                                                                                                                                                                                                                            |

|                       |           |         |     |       |                                                            |
|-----------------------|-----------|---------|-----|-------|------------------------------------------------------------|
| al, 2022              |           |         |     |       | Repeated Low-Level Red-Light Therapy                       |
|                       |           |         |     |       | 0.01% Atropine                                             |
| Oh, SY.et al, 2022    | Korea     | 12      | 472 | 5-12  |                                                            |
|                       |           |         |     |       | Atropine sulfate 01 ophthalmic solution                    |
|                       |           |         |     |       | Atropine sulfate 02 ophthalmic solution                    |
|                       |           |         |     |       | Atropine sulfate 03 ophthalmic solution                    |
|                       |           |         |     |       | Placebo ophthalmic solution                                |
| Revell, T.et al, 2022 | Australia | 28 days | 82  | 18-36 |                                                            |
|                       |           |         |     |       | 0.025% eyedrop aqueous solution (Active Comparator)        |
|                       |           |         |     |       | CBT-009 vehicle formulation (Vehicle)                      |
|                       |           |         |     |       | CBT-009 low dose formulation                               |
|                       |           |         |     |       | CBT-009 mid dose formulation                               |
|                       |           |         |     |       | CBT-009 high dose formulation                              |
| Zhao, C.et al, 2022   | China     | 12      | 334 | 5-14  |                                                            |
|                       |           |         |     |       | 0.01% Atropine eye drops                                   |
|                       |           |         |     |       | Placebo eye drops (0.9% preservative free sodium chloride) |
| Xu, Y.et al, 2022     | China     | 7 days  | 144 | 6-12  |                                                            |
|                       |           |         |     |       | 1% Atropine eye drops                                      |
|                       |           |         |     |       | Tropicamide eye drops                                      |

a. All data extracted from ClinicalTrials.gov (<https://clinicaltrials.gov/>)



## eAppendix References

1. Yen MY, Liu JH, Kao SC, Shiao CH. Comparison of the effect of atropine and cyclopentolate on myopia. *Ann Ophthalmol*. May 1989;21(5):180-2, 187.
2. Shih YF, Chen CH, Chou AC, Ho TC, Lin LL, Hung PT. Effects of different concentrations of atropine on controlling myopia in myopic children. *J Ocul Pharmacol Ther*. Feb 1999;15(1):85-90. doi:10.1089/jop.1999.15.85
3. Shih YF, Hsiao CK, Chen CJ, Chang CW, Hung PT, Lin LL. An intervention trial on efficacy of atropine and multi-focal glasses in controlling myopic progression. *Acta Ophthalmol Scand*. Jun 2001;79(3):233-6. doi:10.1034/j.1600-0420.2001.790304.x
4. Chua WH, Balakrishnan V, Chan YH, et al. Atropine for the treatment of childhood myopia. *Ophthalmology*. Dec 2006;113(12):2285-91. doi:10.1016/j.ophtha.2006.05.062
5. Liang CK, Ho TY, Li TC, et al. A combined therapy using stimulating auricular acupoints enhances lower-level atropine eyedrops when used for myopia control in school-aged children evaluated by a pilot randomized controlled clinical trial. *Complement Ther Med*. Dec 2008;16(6):305-10. doi:10.1016/j.ctim.2008.04.007
6. Chia A, Chua WH, Cheung YB, et al. Atropine for the treatment of childhood myopia: safety and efficacy of 0.5%, 0.1%, and 0.01% doses (Atropine for the Treatment of Myopia 2). *Ophthalmology*. Feb 2012;119(2):347-54. doi:10.1016/j.ophtha.2011.07.031
7. Yi S, Huang Y, Yu SZ, Chen XJ, Yi H, Zeng XL. Therapeutic effect of atropine 1% in children with low myopia. *J aapos*. Oct 2015;19(5):426-9. doi:10.1016/j.jaapos.2015.04.006
8. Wang YR, Bian HL, Wang Q. Atropine 0.5% eyedrops for the treatment of children with low myopia: A randomized controlled trial. *Medicine (Baltimore)*. Jul 2017;96(27):e7371. doi:10.1097/md.00000000000007371
9. Yam JC, Jiang Y, Tang SM, et al. Low-Concentration Atropine for Myopia Progression (LAMP) Study: A Randomized, Double-Blinded, Placebo-Controlled Trial of 0.05%, 0.025%, and 0.01% Atropine Eye Drops in Myopia Control. *Ophthalmology*. Jan 2019;126(1):113-124. doi:10.1016/j.ophtha.2018.05.029
10. Fu A, Stapleton F, Wei L, et al. Effect of low-dose atropine on myopia progression, pupil diameter and accommodative amplitude: low-dose atropine and myopia progression. *Br J Ophthalmol*. Nov 2020;104(11):1535-1541. doi:10.1136/bjophthalmol-2019-315440
11. Kinoshita N, Konno Y, Hamada N, et al. Efficacy of combined orthokeratology and 0.01% atropine solution for slowing axial elongation in children with myopia: a 2-year randomised trial. *Sci Rep*. Jul 29 2020;10(1):12750. doi:10.1038/s41598-020-69710-8
12. Tan Q, Ng AL, Choy BN, Cheng GP, Woo VC, Cho P. One-year results of 0.01% atropine with orthokeratology (AOK) study: a randomised clinical trial. *Ophthalmic Physiol Opt*. Sep 2020;40(5):557-566. doi:10.1111/opo.12722
13. Wei S, Li SM, An W, et al. Safety and Efficacy of Low-Dose Atropine Eyedrops for the Treatment of Myopia Progression in Chinese Children: A Randomized Clinical Trial. *JAMA Ophthalmol*. Nov 1 2020;138(11):1178-1184. doi:10.1001/jamaophthalmol.2020.3820
14. Ye L, Shi Y, Yin Y, et al. Effects of Atropine Treatment on Choroidal Thickness in Myopic Children. *Invest Ophthalmol Vis Sci*. Dec 1 2020;61(14):15. doi:10.1167/iovs.61.14.15
15. Zhao Q, Hao Q. Clinical efficacy of 0.01% atropine in retarding the progression of myopia in children. *Int Ophthalmol*. Mar 2021;41(3):1011-1017. doi:10.1007/s10792-020-01658-0
16. Moriche-Carretero M, Revilla-Amores R, Diaz-Valle D, Morales-Fernandez L, Gomez-de-Liano R. Myopia progression and axial elongation in Spanish children: Efficacy of atropine 0.01% eye-drops. *J Fr Ophthalmol*. Dec 2021;44(10):1499-1504. doi:10.1016/j.jfo.2021.07.005
17. Saxena R, Dhiman R, Gupta V, et al. Atropine for the Treatment of Childhood Myopia in India: Multicentric Randomized Trial. *Ophthalmology*. Sep 2021;128(9):1367-1369. doi:10.1016/j.ophtha.2021.01.026
18. Hieda O, Hiraoka T, Fujikado T, et al. Efficacy and safety of 0.01% atropine for prevention of childhood myopia in a 2-year randomized placebo-controlled study. *Jpn J Ophthalmol*. May 2021;65(3):315-325. doi:10.1007/s10384-021-00822-y
19. Zhao Q, Hao Q. Comparison of the Clinical Efficacies of 0.01% Atropine and Orthokeratology in Controlling the Progression of Myopia in Children. *Ophthalmic Epidemiol*. Oct 2021;28(5):376-382. doi:10.1080/09286586.2021.1875010
20. Hao Q, Zhao Q. Changes in subfoveal choroidal thickness in myopic children with 0.01% atropine, orthokeratology, or their combination. *Int Ophthalmol*. Sep

2021;41(9):2963-2971. doi:10.1007/s10792-021-01855-5

21. Cui C, Li X, Lyu Y, et al. Safety and efficacy of 0.02% and 0.01% atropine on controlling myopia progression: a 2-year clinical trial. *Sci Rep*. Nov 15 2021;11(1):22267. doi:10.1038/s41598-021-01708-2
22. Lee SS, Lingham G, Blaszkowska M, et al. Low-concentration atropine eyedrops for myopia control in a multi-racial cohort of Australian children: A randomised clinical trial. *Clin Exp Ophthalmol*. Aug 25 2022;doi:10.1111/ceo.14148
23. Jethani J. Efficacy of low-concentration atropine (0.01%) eye drops for prevention of axial myopic progression in premyopes. *Indian J Ophthalmol*. Jan 2022;70(1):238-240. doi:10.4103/ijo.IJO\_1462\_21
24. Chan HHL, Choi KY, Ng ALK, et al. Efficacy of 0.01% atropine for myopia control in a randomized, placebo-controlled trial depends on baseline electroretinal response. *Sci Rep*. Jul 8 2022;12(1):11588. doi:10.1038/s41598-022-15686-6
25. Sen S, Yadav H, Jain A, Verma S, Gupta P. Effect of atropine 0.01% on progression of myopia. *Indian J Ophthalmol*. Sep 2022;70(9):3373-3376. doi:10.4103/ijo.IJO\_256\_22
26. Chen Y, Xiong R, Chen X, et al. Efficacy Comparison of Repeated Low-Level Red Light and Low-Dose Atropine for Myopia Control: A Randomized Controlled Trial. *Transl Vis Sci Technol*. Oct 3 2022;11(10):33. doi:10.1167/tvst.11.10.33
27. Yu S, Du L, Ji N, et al. Combination of orthokeratology lens with 0.01% atropine in slowing axial elongation in children with myopia: a randomized double-blinded clinical trial. *BMC Ophthalmol*. Nov 15 2022;22(1):438. doi:10.1186/s12886-022-02635-0

eTable 1. Outdoor Time and Near Work over Two Years

|                                                  | 0.05% Atropine        |                         |                          | 0.01% Atropine        |                         |                          | Placebo               |                         |                          | <i>P</i> value <sup>c</sup> |               |                |
|--------------------------------------------------|-----------------------|-------------------------|--------------------------|-----------------------|-------------------------|--------------------------|-----------------------|-------------------------|--------------------------|-----------------------------|---------------|----------------|
|                                                  | Baseline<br>Mean (SD) | First-year<br>Mean (SD) | Second year<br>Mean (SD) | Baseline<br>Mean (SD) | First-year<br>Mean (SD) | Second year<br>Mean (SD) | Baseline<br>Mean (SD) | First-year<br>Mean (SD) | Second year<br>Mean (SD) | Baseline                    | First<br>year | Second<br>year |
| Outdoor activity,<br>hours per day <sup>a</sup>  | 1.48<br>(0.51)        | 1.49<br>(0.53)          | 1.45<br>(0.56)           | 1.50<br>(0.48)        | 1.42<br>(0.63)          | 1.38<br>(0.58)           | 1.46<br>(0.48)        | 1.32<br>(0.50)          | 1.39<br>(0.51)           | 0.81                        | 0.07          | 0.61           |
| Near work, diopter<br>hours per day <sup>b</sup> | 10.55<br>(3.55)       | 11.79<br>(3.82)         | 12.75<br>(3.99)          | 10.20<br>(3.64)       | 12.83<br>(4.28)         | 13.32<br>(3.92)          | 10.54<br>(3.69)       | 11.90<br>(3.39)         | 12.77<br>(3.74)          | 0.71                        | 0.08          | 0.53           |

a. Outdoor activity = outdoor exercise + outdoor leisure activity.

b. Near work = 3\*(homework + reading + playing cell phone) + 2\*(using computer + playing video game) + 1\*(watching TV).

c. *P* values were generated by the analysis of variance (ANOVA) test.

eTable 2. Baseline Demographics and Clinical Characteristics in 0.05% Atropine, 0.01% Atropine and Placebo Groups for Those Who Completed 2 Years versus Those Who Did Not Complete 2 Years of Treatment

|                                               | Completed 2 years (n=353) |                           |                    | Did not complete 2 years (n=121) |                          |                   |
|-----------------------------------------------|---------------------------|---------------------------|--------------------|----------------------------------|--------------------------|-------------------|
|                                               | 0.05% Atropine<br>(n=116) | 0.01% Atropine<br>(n=122) | Placebo<br>(n=115) | 0.05% Atropine<br>(n=44)         | 0.01% Atropine<br>(n=37) | Placebo<br>(n=40) |
|                                               | Mean (SD)                 | Mean (SD)                 | Mean (SD)          | Mean (SD)                        | Mean (SD)                | Mean (SD)         |
| Age, years                                    | 6.73 (1.46)               | 6.86 (1.30)               | 6.77 (1.23)        | 7.22 (1.25)                      | 6.94 (1.52)              | 6.68 (1.40)       |
| Sex, No. (%)                                  |                           |                           |                    |                                  |                          |                   |
| Male                                          | 59 (50.9%)                | 59 (48.4%)                | 60 (52.2%)         | 22 (50.0%)                       | 19 (51.4%)               | 18 (45.0%)        |
| Female                                        | 57 (49.1%)                | 63 (51.6%)                | 55 (47.8%)         | 22 (50.0%)                       | 18 (48.6%)               | 22 (55.0%)        |
| BMI, kg/m <sup>2</sup>                        | 15.76 (2.79)              | 15.62 (2.06)              | 15.37 (1.94)       | 15.39 (2.01)                     | 15.48 (2.24)             | 15.82 (2.18)      |
| Spherical equivalent, D                       | 0.50 (0.32)               | 0.51 (0.33)               | 0.54 (0.32)        | 0.50 (0.33)                      | 0.50 (0.35)              | 0.50 (0.30)       |
| Axial length, mm                              | 22.80 (0.72)              | 22.93 (0.71)              | 22.80 (0.64)       | 22.90 (0.75)                     | 22.79 (0.68)             | 22.78 (0.67)      |
| Central corneal thickness, um                 | 555.43 (31.19)            | 557.18 (33.35)            | 554.15 (32.60)     | 557.74 (35.00)                   | 551.76 (25.95)           | 550.27 (29.46)    |
| IOP, mmHg                                     | 16.02 (2.07)              | 15.91 (2.10)              | 15.85 (1.93)       | 15.57 (1.83)                     | 15.66 (1.68)             | 16.30 (1.86)      |
| Photopic pupil size, mm                       | 3.52 (0.56)               | 3.55 (0.60)               | 3.66 (0.63)        | 3.64 (0.59)                      | 3.63 (0.64)              | 3.75 (0.91)       |
| Mesopic pupil size, mm                        | 6.37 (0.64)               | 6.33 (0.77)               | 6.53 (0.75)        | 6.34 (0.77)                      | 6.39 (0.65)              | 6.53 (0.75)       |
| Accommodation amplitude, D                    | 13.48 (2.94)              | 13.59 (2.51)              | 13.29 (2.75)       | 12.97 (1.86)                     | 13.66 (3.19)             | 13.44 (2.75)      |
| Distance VA, logMAR                           | 0.03 (0.09)               | 0.02 (0.08)               | 0.02 (0.07)        | 0.02 (0.12)                      | 0.03 (0.11)              | 0.02 (0.07)       |
| Near VA, logMAR                               | 0.04 (0.10)               | 0.03 (0.10)               | 0.03 (0.09)        | 0.03 (0.09)                      | 0.04 (0.13)              | 0.01 (0.10)       |
| Outdoor activity, hours per day <sup>a</sup>  | 1.46 (0.52)               | 1.50 (0.48)               | 1.46 (0.48)        | 1.52 (0.52)                      | 1.50 (0.52)              | 1.44 (0.48)       |
| Near work, diopter hours per day <sup>b</sup> | 10.62 (3.42)              | 10.58 (3.60)              | 10.56 (3.77)       | 10.19 (4.00)                     | 8.94 (3.52)              | 10.47 (3.51)      |
| No. of Parental myopia                        |                           |                           |                    |                                  |                          |                   |
| 1                                             | 41 (35.3%)                | 49 (40.2%)                | 36 (31.3%)         | 25 (56.8%)                       | 13 (35.1%)               | 22 (55.0%)        |
| 2                                             | 75 (64.7%)                | 73 (59.8%)                | 79 (68.7%)         | 19 (43.2%)                       | 24 (64.9%)               | 18 (45.0%)        |
| Baseline visit before the COVID-19 pandemic   | 64 (55.2%)                | 77 (63.1%)                | 72 (62.6%)         | 30 (68.2%)                       | 25 (67.6%)               | 20 (50.0%)        |

Abbreviations: VA = visual acuity; IOP = intraocular pressure; logMAR = logarithm of the minimum angle of resolution; D = diopter.

a. Outdoor activity = outdoor exercise + outdoor leisure activity.

b. Near work = 3\*(homework + reading + playing cell phone) + 2\*(using computer + playing video game) + 1\*(watching TV).

eTable 3. Dropout Rate and Compliance over Two Years

|                                             | 0.05% Atropine | 0.01% Atropine | Placebo     | <i>P</i> value <sup>a</sup> |
|---------------------------------------------|----------------|----------------|-------------|-----------------------------|
| Dropout rate in the 1 <sup>st</sup> year    | 24 (15.0%)     | 20 (12.6%)     | 27 (17.4%)  | 0.49                        |
| Dropout rate in 2 years                     | 44 (27.5%)     | 37 (23.3%)     | 40 (25.8%)  | 0.68                        |
| >75% Compliance in the 1 <sup>st</sup> year | 126 (92.7%)    | 131 (94.2%)    | 123 (96.1%) | 0.48                        |
| >75% Compliance in the 2 <sup>nd</sup> year | 105 (90.5%)    | 114 (93.4%)    | 110 (95.7%) | 0.30                        |

a. *P* values were generated by Pearson's Chi-square test.

eTable 4. Association between Dropout and Baseline Characteristics

| Baseline Characteristics         | Dependent variable: Dropout over two years (no as reference) |                             | Dependent variable: Dropout during the second year (no as reference) |                             | Dependent variable: Dropout during the first year (no as reference) |                             |
|----------------------------------|--------------------------------------------------------------|-----------------------------|----------------------------------------------------------------------|-----------------------------|---------------------------------------------------------------------|-----------------------------|
|                                  | OR (95%CI)                                                   | <i>P</i> value <sup>a</sup> | OR (95%CI) <sup>a</sup>                                              | <i>P</i> value <sup>a</sup> | OR (95%CI) <sup>a</sup>                                             | <i>P</i> value <sup>a</sup> |
| Treatment                        | Reference                                                    |                             | Reference                                                            |                             | Reference                                                           |                             |
| Placebo                          | Reference                                                    |                             | Reference                                                            |                             | Reference                                                           |                             |
| 0.01% Atropine                   | 0.87 (0.52-1.46)                                             | 0.60                        | 1.23 (0.57-2.65)                                                     | 0.59                        | 0.68 (0.37-1.28)                                                    | 0.23                        |
| 0.05% Atropine                   | 1.09 (0.66-1.80)                                             | 0.73                        | 1.53 (0.73-3.21)                                                     | 0.27                        | 0.84 (0.46-1.53)                                                    | 0.56                        |
| Age, years                       | 1.09 (0.93-1.27)                                             | 0.28                        | 1.35 (1.08-1.68)                                                     | 0.009 <sup>c</sup>          | 0.90 (0.75-1.09)                                                    | 0.29                        |
| Sex, male as reference           | 1.07 (0.71-1.62)                                             | 0.75                        | 1.02 (0.56-1.84)                                                     | 0.96                        | 1.11 (0.67-1.83)                                                    | 0.70                        |
| Spherical equivalent, D          | 0.88 (0.46-1.66)                                             | 0.68                        | 0.60 (0.24-1.52)                                                     | 0.28                        | 1.21 (0.55-2.65)                                                    | 0.63                        |
| Outdoor activity, hours per day  | 1.19 (0.72-1.97)                                             | 0.51                        | 0.95 (0.49-1.86)                                                     | 0.89                        | 1.52 (0.77-2.99)                                                    | 0.23                        |
| Near work, diopter hours per day | 0.94 (0.87-1.01)                                             | 0.10                        | 0.94 (0.85-1.03)                                                     | 0.20                        | 0.95 (0.86-1.05)                                                    | 0.27                        |
| No. of Parental myopia           | 0.54 (0.36-0.82)                                             | 0.004 <sup>b</sup>          | 1.41 (0.73-2.71)                                                     | 0.30                        | 0.27 (0.16-0.46)                                                    | <0.001 <sup>d</sup>         |

a. *P* values were calculated by univariate logistic regression.

b. There was no significant interaction between treatment and parental myopia on the dropout over two years.

c. There was no significant interaction between treatment and age on the dropout during the second year.

d. There was no significant interaction between treatment and parental myopia on the dropout during the first year.

eTable 5. Comparison of Baseline and First Year Outcomes between Those Discontinued after the First Year and Those Completed Two Years

|                                                                        | Completed 2 years (n=353)          |                                    |                                    | Discontinued after the first year (n=50) |                                   |                                  |
|------------------------------------------------------------------------|------------------------------------|------------------------------------|------------------------------------|------------------------------------------|-----------------------------------|----------------------------------|
|                                                                        | 0.05% Atropine<br>(n=116)          | 0.01% Atropine<br>(n=122)          | Placebo<br>(n=115)                 | 0.05% Atropine<br>(n=20)                 | 0.01% Atropine<br>(n=17)          | Placebo<br>(n=13)                |
| Baseline spherical equivalent, D                                       | 0.50<br>(0.44 to 0.56)             | 0.51<br>(0.45 to 0.57)             | 0.54<br>(0.48 to 0.59)             | 0.46<br>(0.30 to 0.61)                   | 0.43<br>(0.28 to 0.58)            | 0.51<br>(0.33 to 0.69)           |
| Baseline axial length, mm                                              | 22.80<br>(22.67 to 22.94)          | 22.93<br>(22.80 to 23.06)          | 22.80<br>(22.69 to 22.92)          | 22.85<br>(22.46 to 23.23)                | 22.72<br>(22.35 to 23.09)         | 22.56<br>(22.19 to 22.93)        |
| Spherical equivalent change during 1 <sup>st</sup> year, D             | -0.10<br>(-0.17 to -0.03)          | -0.35<br>(-0.44 to -0.27)          | -0.53<br>(-0.63 to -0.43)          | -0.16<br>(-0.45 to 0.12)                 | -0.58<br>(-0.86 to -0.30)         | -0.68<br>(-1.12 to -0.25)        |
| Axial length change during 1 <sup>st</sup> year, mm                    | 0.24<br>(0.21 to 0.27)             | 0.33<br>(0.30 to 0.37)             | 0.39<br>(0.35 to 0.44)             | 0.26<br>(0.15 to 0.37)                   | 0.38<br>(0.25 to 0.51)            | 0.49<br>(0.30 to 0.68)           |
| Cumulative myopia incidence in 1 <sup>st</sup> year <sup>a</sup>       | 10/116 (8.6%)<br>(4.8% to 15.6%)   | 29/122 (23.8%)<br>(17.3% to 32.7%) | 35/115 (30.4%)<br>(23.1% to 40.1%) | 3/20 (15.0%)<br>(5.3% to 42.6%)          | 6/17 (35.3%)<br>(18.5% to 67.2%)  | 4/13 (30.8%)<br>(13.6% to 69.5%) |
| Proportion with fast myopic shift in 1 <sup>st</sup> year <sup>b</sup> | 33/116 (28.4%)<br>(21.3% to 38.0%) | 58/122 (47.5%)<br>(39.5% to 57.3%) | 73/115 (63.5%)<br>(55.3% to 72.9%) | 6/20 (30.0%)<br>(15.4% to 58.6%)         | 10/17 (58.8%)<br>(39.5% to 87.6%) | 8/13 (61.5%)<br>(40.0% to 94.6%) |

a. Myopia was defined as spherical equivalent less or equal than -0.50D in at least one eye.

b. Fast myopic shift was defined as spherical equivalent myopic shift equal or more than 0.50D over 1<sup>st</sup> year in at least one eye.

eTable 6. Myopia Incidence over Two Years Using Different Cut-off Points to Define Myopia

| Cumulative myopia incidence (defined as spherical equivalent $\leq -0.75D$ ) |                       |                       |                   |                                    |                                             |                                                                |                     |                     |                                                                      |        |      |
|------------------------------------------------------------------------------|-----------------------|-----------------------|-------------------|------------------------------------|---------------------------------------------|----------------------------------------------------------------|---------------------|---------------------|----------------------------------------------------------------------|--------|------|
|                                                                              | (2) 0.05%<br>Atropine | (1) 0.01%<br>Atropine | (0)<br>Placebo    | <i>P</i> for<br>trend <sup>a</sup> | Adjusted <i>P</i><br>for trend <sup>b</sup> | Difference, % (95%CI)<br>(2) vs. (1), (2) vs. (0), (1) vs. (0) |                     |                     | <i>P</i> value <sup>c</sup><br>(2) vs. (1), (2) vs. (0), (1) vs. (0) |        |      |
| 4 months                                                                     | 1/138<br>(0.7%)       | 3/127<br>(2.4%)       | 5/130<br>(3.8%)   | 0.10                               | 0.13                                        | 1.6 (-1.9 to 6.1)                                              | 3.1 (-0.6 to 8.1)   | 1.5 (-3.3 to 6.6)   | 0.27                                                                 | 0.08   | 0.49 |
| 8 months                                                                     | 3/132<br>(2.3%)       | 9/131<br>(6.9%)       | 14/120<br>(11.7%) | 0.005                              | 0.001                                       | 4.6 (-0.5 to 10.6)                                             | 9.4 (3.5 to 16.6)   | 4.8 (-2.4 to 12.6)  | 0.07                                                                 | 0.003  | 0.19 |
| 12 months                                                                    | 6/136<br>(4.4%)       | 20/139<br>(14.4%)     | 30/128<br>(23.4%) | <0.001                             | <0.001                                      | 10.0 (3.3 to 17.3)                                             | 19.0 (11.2 to 27.6) | 9.0 (0.0 to 18.6)   | 0.005                                                                | <0.001 | 0.06 |
| 16 months                                                                    | 14/124<br>(11.3%)     | 34/132<br>(25.8%)     | 38/124<br>(30.6%) | <0.001                             | <0.001                                      | 14.5 (5.1 to 23.9)                                             | 19.4 (9.5 to 29.2)  | 4.9 (-6.1 to 15.9)  | 0.003                                                                | <0.001 | 0.38 |
| 20 months                                                                    | 18/95<br>(18.9%)      | 30/92<br>(32.6%)      | 32/88<br>(36.4%)  | 0.01                               | 0.005                                       | 13.7 (11.5 to 26.0)                                            | 17.4 (4.5 to 30.0)  | 3.8 (-10.1 to 17.5) | 0.03                                                                 | 0.008  | 0.60 |
| 24 months                                                                    | 31/116<br>(26.7%)     | 45/122<br>(36.9%)     | 52/115<br>(45.2%) | 0.004                              | 0.007                                       | 10.2 (-1.7 to 21.7)                                            | 18.5 (6.2 to 30.3)  | 8.3 (-4.2 to 20.6)  | 0.09                                                                 | 0.003  | 0.19 |
| Cumulative myopia incidence (defined as spherical equivalent $\leq -1.00D$ ) |                       |                       |                   |                                    |                                             |                                                                |                     |                     |                                                                      |        |      |
| 4 months                                                                     | 0/138<br>(0.0%)       | 1/127<br>(0.8%)       | 1/130<br>(0.8%)   | 0.40                               | 0.37                                        | 0.8 (-1.9 to 4.3)                                              | 0.8 (-1.9 to 4.2)   | 0.0 (-3.6 to 3.5)   | 0.30                                                                 | 0.30   | 0.99 |
| 8 months                                                                     | 1/132<br>(0.8%)       | 7/131<br>(5.3%)       | 11/120<br>(9.2%)  | 0.004                              | 0.001                                       | 4.6 (0.6 to 10.0)                                              | 8.4 (3.7 to 15.0)   | 3.8 (-2.7 to 11.0)  | 0.03                                                                 | 0.002  | 0.24 |
| 12 months                                                                    | 3/136<br>(2.2%)       | 14/139<br>(10.1%)     | 20/128<br>(15.6%) | <0.001                             | <0.001                                      | 7.9 (2.4 to 14.3)                                              | 13.4 (7.1 to 21.0)  | 5.6 (-2.5 to 14.0)  | 0.007                                                                | <0.001 | 0.17 |
| 16 months                                                                    | 8/124<br>(6.5%)       | 25/132<br>(18.9%)     | 27/124<br>(21.8%) | 0.001                              | <0.001                                      | 12.5 (4.5 to 20.8)                                             | 15.3 (7.0 to 24.2)  | 2.8 (-7.1 to 12.8)  | 0.003                                                                | <0.001 | 0.57 |
| 20 months                                                                    | 12/95<br>(12.6%)      | 25/92<br>(27.2%)      | 27/88<br>(30.7%)  | 0.004                              | 0.002                                       | 14.5 (3.2 to 26.0)                                             | 18.1 (6.3 to 29.9)  | 3.5 (-9.7 to 16.7)  | 0.01                                                                 | 0.003  | 0.60 |
| 24 months                                                                    | 19/116<br>(16.4%)     | 38/122<br>(31.1%)     | 44/115<br>(38.3%) | <0.001                             | <0.001                                      | 14.8 (4.0 to 25.3)                                             | 21.9 (10.6 to 32.9) | 7.1 (-5.0 to 19.1)  | 0.008                                                                | <0.001 | 0.25 |

a. *P* values for trends were calculated via logistic regression without adjustment

b. Adjusted *P* values for trends were calculated via logistic regression with adjustment of baseline age, sex, baseline spherical equivalent, outdoor time, near work, and parental myopia.

c. *P* values were calculated by exact unconditional methods based on the Farrington-Manning score statistic.



eTable 7. Myopia Incidence over Two Years (Including Those Who Had Become Myopic before Discontinuing Treatment) <sup>a</sup>

| Cumulative myopia incidence (defined as spherical equivalent ≤ -0.50D) |                   |                   |                   |                                 |                                          |                                       |                     |                    |                                       |        |      |
|------------------------------------------------------------------------|-------------------|-------------------|-------------------|---------------------------------|------------------------------------------|---------------------------------------|---------------------|--------------------|---------------------------------------|--------|------|
|                                                                        | (2) 0.05%         | (1) 0.01%         | (0)               | <i>P</i> for trend <sup>b</sup> | Adjusted <i>P</i> for trend <sup>c</sup> | Difference, % (95%CI)                 |                     |                    | <i>P</i> value <sup>d</sup>           |        |      |
|                                                                        | Atropine          | Atropine          | Placebo           |                                 |                                          | (2) vs. (1), (2) vs. (0), (1) vs. (0) |                     |                    | (2) vs. (1), (2) vs. (0), (1) vs. (0) |        |      |
| 4 months                                                               | 1/138<br>(0.7%)   | 4/127<br>(3.1%)   | 8/130<br>(6.2%)   | 0.02                            | 0.01                                     | 2.4 (-1.2 to 7.2)                     | 5.4 (1.4 to 11.0)   | 3.0 (-2.5 to 8.9)  | 0.15                                  | 0.01   | 0.25 |
| 8 months                                                               | 8/132<br>(6.1%)   | 20/131<br>(15.3%) | 22/121<br>(18.2%) | 0.005                           | 0.001                                    | 9.2 (1.8 to 17.1)                     | 12.1 (4.3 to 20.6)  | 2.9 (-6.4 to 12.4) | 0.02                                  | 0.003  | 0.54 |
| 12 months                                                              | 13/136<br>(9.6%)  | 36/140<br>(25.7%) | 43/132<br>(32.6%) | <0.001                          | <0.001                                   | 16.2 (7.4 to 25.1)                    | 23.0 (13.6 to 32.5) | 6.9 (-3.9 to 17.6) | <0.001                                | <0.001 | 0.21 |
| 16 months                                                              | 23/124<br>(18.5%) | 45/134<br>(33.6%) | 51/131<br>(38.9%) | 0.001                           | <0.001                                   | 15.0 (4.3 to 25.4)                    | 20.4 (9.4 to 31.0)  | 5.3 (-6.2 to 16.8) | 0.006                                 | <0.001 | 0.37 |
| 20 months                                                              | 28/97<br>(28.9%)  | 41/97<br>(42.3%)  | 47/97<br>(48.5%)  | 0.006                           | 0.001                                    | 13.4 (-0.1 to 26.4)                   | 19.6 (5.9 to 32.6)  | 6.2 (-7.8 to 19.9) | 0.05                                  | 0.005  | 0.39 |
| 24 months                                                              | 36/119<br>(30.3%) | 64/130<br>(49.2%) | 71/125<br>(56.8%) | <0.001                          | <0.001                                   | 19.0 (6.8 to 30.5)                    | 26.5 (14.2 to 38.0) | 7.6 (-4.7 to 19.6) | 0.002                                 | <0.001 | 0.23 |

a. Those who became myopic before dropping out were included in the myopia incidence calculation because the onset of myopia is irreversible.

b. *P* values for trend were calculated via logistic regression without adjustment.

c. Adjusted *P* values for trend were calculated via logistic regression with adjustment of baseline age, sex, baseline spherical equivalent, outdoor time, near work, and parental myopia.

d. *P* values were calculated by exact unconditional methods based on the Farrington-Manning score statistic.

eTable 8. Myopia Incidence over Two Years (Including the Missing Data for Those Who Had Missed the Follow-up Visit before 24-month but Had Completed Two Years) <sup>a</sup>

| Cumulative myopia incidence (defined as spherical equivalent $\leq -0.50D$ ) |                       |                       |                   |                                    |                                             |                                                                |                     |                    |                                                                      |        |      |
|------------------------------------------------------------------------------|-----------------------|-----------------------|-------------------|------------------------------------|---------------------------------------------|----------------------------------------------------------------|---------------------|--------------------|----------------------------------------------------------------------|--------|------|
|                                                                              | (2) 0.05%<br>Atropine | (1) 0.01%<br>Atropine | (0)<br>Placebo    | <i>P</i> for<br>trend <sup>b</sup> | Adjusted <i>P</i><br>for trend <sup>c</sup> | Difference, % (95%CI)<br>(2) vs. (1), (2) vs. (0), (1) vs. (0) |                     |                    | <i>P</i> value <sup>d</sup><br>(2) vs. (1), (2) vs. (0), (1) vs. (0) |        |      |
| 4 months                                                                     | 1/142<br>(0.7%)       | 4/140<br>(2.9%)       | 8/136<br>(5.9%)   | 0.02                               | 0.02                                        | 2.2 (-1.3 to 6.5)                                              | 5.2 (1.3 to 10.6)   | 3.0 (-2.0 to 8.7)  | 0.17                                                                 | 0.01   | 0.22 |
| 8 months                                                                     | 8/139<br>(5.8%)       | 20/138<br>(14.5%)     | 21/131<br>(16.0%) | 0.01                               | 0.004                                       | 8.7 (1.7 to 16.3)                                              | 10.3 (3.0 to 18.2)  | 1.5 (-7.2 to 10.4) | 0.02                                                                 | 0.006  | 0.73 |
| 12 months                                                                    | 13/136<br>(9.6%)      | 35/139<br>(25.2%)     | 39/128<br>(30.5%) | <0.001                             | <0.001                                      | 15.6 (6.9 to 24.5)                                             | 20.9 (11.6 to 30.4) | 5.3 (-5.4 to 16.0) | <0.001                                                               | <0.001 | 0.33 |
| 16 months                                                                    | 23/129<br>(17.8%)     | 43/134<br>(32.1%)     | 44/125<br>(35.2%) | 0.002                              | 0.001                                       | 14.3 (3.8 to 24.5)                                             | 17.4 (6.6 to 27.9)  | 3.1 (-8.4 to 14.6) | 0.008                                                                | 0.002  | 0.60 |
| 20 months                                                                    | 26/122<br>(21.3%)     | 46/123<br>(37.4%)     | 50/118<br>(42.4%) | 0.001                              | <0.001                                      | 16.1 (4.7 to 27.1)                                             | 21.1 (9.4 to 32.3)  | 5.0 (-7.4 to 17.2) | 0.006                                                                | <0.001 | 0.43 |
| 24 months                                                                    | 33/116<br>(28.4%)     | 56/122<br>(45.9%)     | 61/115<br>(53.0%) | <0.001                             | <0.001                                      | 17.5 (5.2 to 29.2)                                             | 24.6 (12.0 to 36.4) | 7.1 (-5.6 to 19.6) | 0.005                                                                | <0.001 | 0.27 |

a. The missing data was included if 1) participants in both pre and post visit were non-myopic, included as non-myopic. 2) participants in both pre and post visit were myopic, included as myopic.

b. *P* values for trend were calculated via logistic regression without adjustment.

c. Adjusted *P* values for trend were calculated via logistic regression with adjustment of baseline age, sex, baseline spherical equivalent, outdoor time, near work, and parental myopia.

d. *P* values were calculated by exact unconditional methods based on the Farrington-Manning score statistic.

eTable 9. Myopia Incidence over Two Years (Including the Missing Data for Those Who Missed the Follow-up or Discontinued Treatment)

| Cumulative myopia incidence (defined as spherical equivalent $\leq -0.50D$ ), and it was assumed that all missing data were non-myopic. |                       |                       |                    |                                 |                                             |                                                                |                    |                     |                                                                      |        |      |
|-----------------------------------------------------------------------------------------------------------------------------------------|-----------------------|-----------------------|--------------------|---------------------------------|---------------------------------------------|----------------------------------------------------------------|--------------------|---------------------|----------------------------------------------------------------------|--------|------|
|                                                                                                                                         | (2) 0.05%<br>Atropine | (1) 0.01%<br>Atropine | (0)<br>Placebo     | <i>P</i> for trend <sup>a</sup> | Adjusted <i>P</i><br>for trend <sup>b</sup> | Difference, % (95%CI)<br>(2) vs. (1), (2) vs. (0), (1) vs. (0) |                    |                     | <i>P</i> value <sup>c</sup><br>(2) vs. (1), (2) vs. (0), (1) vs. (0) |        |      |
| 4 months                                                                                                                                | 1/160<br>(0.6%)       | 4/159<br>(2.5%)       | 8/155<br>(5.2%)    | 0.02                            | 0.02                                        | 1.9 (-1.2 to 5.7)                                              | 4.5 (1.1 to 9.3)   | 2.6 (-1.8 to 7.7)   | 0.17                                                                 | 0.02   | 0.22 |
| 8 months                                                                                                                                | 8/160<br>(5.0%)       | 20/159<br>(12.6%)     | 21/155<br>(13.5%)  | 0.01                            | 0.009                                       | 7.6 (1.4 to 14.2)                                              | 8.5 (2.3 to 15.4)  | 1.0 (-6.6 to 8.6)   | 0.02                                                                 | 0.009  | 0.80 |
| 12 months                                                                                                                               | 13/160<br>(8.1%)      | 35/159<br>(22.0%)     | 39/155<br>(25.2%)  | <0.001                          | <0.001                                      | 13.9 (6.2 to 21.8)                                             | 17.0 (9.1 to 25.3) | 3.1 (-6.3 to 12.6)  | <0.001                                                               | <0.001 | 0.51 |
| 16 months                                                                                                                               | 23/160<br>(14.4%)     | 43/159<br>(27.0%)     | 44/155<br>(28.4%)  | 0.003                           | 0.004                                       | 12.7 (3.8 to 21.5)                                             | 14.0 (5.0 to 23.0) | 1.3 (-8.6 to 11.2)  | 0.005                                                                | 0.002  | 0.79 |
| 20 months                                                                                                                               | 26/160<br>(16.3%)     | 36/159<br>(22.6%)     | 38/155<br>(24.5%)  | 0.07                            | 0.09                                        | 6.4 (-2.3 to 15.1)                                             | 8.3 (-0.6 to 17.2) | 1.9 (-7.5 to 11.3)  | 0.15                                                                 | 0.07   | 0.70 |
| 24 months                                                                                                                               | 33/160<br>(20.6%)     | 56/159<br>(35.2%)     | 61/155<br>(39.4%)  | <0.001                          | 0.001                                       | 14.6 (4.8 to 24.2)                                             | 18.7 (8.7 to 28.5) | 4.1 (-6.5 to 14.7)  | 0.004                                                                | <0.001 | 0.45 |
| Cumulative myopia incidence (defined as spherical equivalent $\leq -0.50D$ ), and it was assumed that all missing data was myopic.      |                       |                       |                    |                                 |                                             |                                                                |                    |                     |                                                                      |        |      |
| 4 months                                                                                                                                | 23/160<br>(14.4%)     | 36/159<br>(22.6%)     | 33/155<br>(21.3%)  | 0.12                            | 0.14                                        | 8.3 (-0.3 to 16.8)                                             | 6.9 (-1.6 to 15.5) | -1.4 (-10.5 to 7.9) | 0.06                                                                 | 0.11   | 0.77 |
| 8 months                                                                                                                                | 36/160<br>(22.5%)     | 48/159<br>(30.2%)     | 56/155<br>(36.1%)  | 0.008                           | 0.002                                       | 7.7 (-2.0 to 17.3)                                             | 13.6 (3.6 to 23.5) | 5.9 (-4.5 to 16.3)  | 0.12                                                                 | 0.008  | 0.26 |
| 12 months                                                                                                                               | 37/160<br>(23.1%)     | 55/159<br>(34.6%)     | 66/155<br>(42.6%)  | <0.001                          | 0.001                                       | 11.5 (1.5 to 21.2)                                             | 19.5 (9.2 to 29.4) | 8.0 (-2.8 to 18.6)  | 0.02                                                                 | <0.001 | 0.15 |
| 16 months                                                                                                                               | 59/160<br>(36.9%)     | 70/159<br>(44.0%)     | 75/155<br>(48.4%)  | 0.04                            | 0.02                                        | 7.2 (-3.6 to 17.8)                                             | 11.5 (0.6 to 22.2) | 4.4 (-6.6 to 15.3)  | 0.19                                                                 | 0.04   | 0.44 |
| 20 months                                                                                                                               | 91/160<br>(56.9%)     | 103/159<br>(64.8%)    | 105/155<br>(67.7%) | 0.05                            | 0.08                                        | 7.9 (-2.8 to 18.4)                                             | 10.9 (0.2 to 21.3) | 3.0 (-7.5 to 13.3)  | 0.15                                                                 | 0.05   | 0.58 |
| 24 months                                                                                                                               | 77/160<br>(48.1%)     | 93/159<br>(58.5%)     | 101/155<br>(65.2%) | 0.002                           | 0.002                                       | 10.4 (-0.6 to 21.1)                                            | 17.0 (6.1 to 27.6) | 6.7 (-4.1 to 17.3)  | 0.06                                                                 | 0.002  | 0.22 |

a. *P* values for trend were calculated via logistic regression without adjustment.

b. Adjusted *P* values for trend were calculated via logistic regression with adjustment of baseline age, sex, baseline spherical equivalent, outdoor time, near work, and parental myopia.

c. *P* values were calculated by exact unconditional methods based on the Farrington-Manning score statistic.

eTable 10. Proportion with Fast Myopic Shift over Two Years Using Different Cut-off Points to Define Fast Myopic Shift

| Proportion with fast myopic shift (defined as spherical equivalent myopic shift $\geq 0.75D$ over the first 12 months; and $\geq 1.50D$ over 24 months) |                       |                       |                   |                                 |                                             |                                                                |                     |                    |                                                                      |        |      |
|---------------------------------------------------------------------------------------------------------------------------------------------------------|-----------------------|-----------------------|-------------------|---------------------------------|---------------------------------------------|----------------------------------------------------------------|---------------------|--------------------|----------------------------------------------------------------------|--------|------|
|                                                                                                                                                         | (2) 0.05%<br>Atropine | (1) 0.01%<br>Atropine | (0)<br>Placebo    | <i>P</i> for trend <sup>a</sup> | Adjusted <i>P</i><br>for trend <sup>b</sup> | Difference, % (95%CI)<br>(2) vs. (1), (2) vs. (0), (1) vs. (0) |                     |                    | <i>P</i> value <sup>c</sup><br>(2) vs. (1), (2) vs. (0), (1) vs. (0) |        |      |
| 12 months                                                                                                                                               | 14/136<br>(10.3%)     | 42/139<br>(30.2%)     | 50/128<br>(39.1%) | <0.001                          | <0.001                                      | 19.9 (10.7 to 29.2)                                            | 28.8 (18.8 to 38.6) | 8.8 (-2.6 to 20.1) | <0.001                                                               | <0.001 | 0.13 |
| 24 months                                                                                                                                               | 14/116<br>(12.1%)     | 38/122<br>(31.1%)     | 43/115<br>(37.4%) | <0.001                          | <0.001                                      | 19.1 (8.8 to 29.2)                                             | 25.3 (14.5 to 35.9) | 6.2 (-5.8 to 18.2) | <0.001                                                               | <0.001 | 0.31 |
| Proportion with fast myopic shift (defined as spherical equivalent myopic shift $\geq 1.00D$ over the first 12 months; and $\geq 2.00D$ over 24 months) |                       |                       |                   |                                 |                                             |                                                                |                     |                    |                                                                      |        |      |
| 12 months                                                                                                                                               | 9/136<br>(6.6%)       | 22/139<br>(15.8%)     | 35/128<br>(27.3%) | <0.001                          | <0.001                                      | 9.2 (1.8 to 17.0)                                              | 20.7 (12.1 to 29.8) | 11.5 (1.7 to 21.4) | 0.02                                                                 | <0.001 | 0.02 |
| 24 months                                                                                                                                               | 9/116<br>(7.8%)       | 17/122<br>(13.9%)     | 23/115<br>(20.0%) | 0.008                           | 0.02                                        | 6.2 (-1.9 to 14.4)                                             | 12.2 (3.5 to 21.4)  | 6.1 (-3.5 to 15.9) | 0.13                                                                 | 0.007  | 0.21 |

a. *P* values for trend were calculated via logistic regression without adjustment.

b. Adjusted *P* values for trend were calculated via logistic regression with adjustment of baseline age, sex, baseline spherical equivalent, outdoor time, near work, and parental myopia.

c. *P* values were calculated by exact unconditional methods based on the Farrington-Manning score statistic.

eTable 11. Proportion with Fast Myopic Shift over Two Years (Including the Missing Data for Those Who Missed the Follow-up or Discontinued Treatment)

| Proportion with fast myopic shift (defined as spherical equivalent myopic shift $\geq 0.50D$ over the first 12 months; and $\geq 1.00D$ over 24 months), and it was assumed that all missing data were not fast myopic shift. |                       |                       |                    |                                 |                                             |                                                                |                     |                    |                                                                      |        |       |
|-------------------------------------------------------------------------------------------------------------------------------------------------------------------------------------------------------------------------------|-----------------------|-----------------------|--------------------|---------------------------------|---------------------------------------------|----------------------------------------------------------------|---------------------|--------------------|----------------------------------------------------------------------|--------|-------|
|                                                                                                                                                                                                                               | (2) 0.05%<br>Atropine | (1) 0.01%<br>Atropine | (0)<br>Placebo     | <i>P</i> for trend <sup>a</sup> | Adjusted <i>P</i><br>for trend <sup>b</sup> | Difference, % (95%CI)<br>(2) vs. (1), (2) vs. (0), (1) vs. (0) |                     |                    | <i>P</i> value <sup>c</sup><br>(2) vs. (1), (2) vs. (0), (1) vs. (0) |        |       |
| 12 months                                                                                                                                                                                                                     | 39/160<br>(24.4%)     | 68/159<br>(42.8%)     | 81/155<br>(52.3%)  | <0.001                          | <0.001                                      | 18.4 (8.1 to 28.4)                                             | 27.9 (17.3 to 37.8) | 9.5 (-1.6 to 20.3) | <0.001                                                               | <0.001 | 0.09  |
| 24 months                                                                                                                                                                                                                     | 29/160<br>(18.1%)     | 55/159<br>(34.6%)     | 62/155<br>(40.0%)  | <0.001                          | <0.001                                      | 16.5 (6.9 to 25.9)                                             | 21.9 (12.0 to 31.5) | 5.4 (-5.3 to 16.0) | <0.001                                                               | <0.001 | 0.32  |
| Proportion with fast myopic shift (defined as spherical equivalent myopic shift $\geq 0.50D$ over the first 12 months; and $\geq 1.00D$ over 24 months), and it was assumed that all missing data was fast myopic shift.      |                       |                       |                    |                                 |                                             |                                                                |                     |                    |                                                                      |        |       |
| 12 months                                                                                                                                                                                                                     | 63/160<br>(39.4%)     | 88/159<br>(55.3%)     | 108/155<br>(69.7%) | <0.001                          | <0.001                                      | 16.0 (5.0 to 26.5)                                             | 30.3 (19.5 to 40.4) | 14.3 (3.6 to 24.7) | 0.004                                                                | <0.001 | 0.009 |
| 24 months                                                                                                                                                                                                                     | 73/160<br>(45.6%)     | 92/159<br>(57.9%)     | 102/155<br>(65.8%) | <0.001                          | <0.001                                      | 12.2 (1.3 to 22.9)                                             | 20.2 (9.3 to 30.6)  | 7.9 (-2.8 to 18.5) | 0.03                                                                 | <0.001 | 0.15  |

a. *P* values for trend were calculated via logistic regression without adjustment.

b. Adjusted *P* value for trend were calculated via logistic regression with adjustment of baseline age, sex, baseline spherical equivalent, outdoor time, near work, and parental myopia.

c. *P* values were calculated by exact unconditional methods based on the Farrington-Manning score statistic.

eTable 12. Spherical Equivalent and Axial Length at Follow-Up Visits over Two years

|                         | (2) 0.05% Atropine |                        | (1) 0.01% Atropine |                        | (0) Placebo |                        | Overall <i>P</i> value <sup>b</sup> | <i>P</i> value, pairwise comparisons<br>(2) vs. (1), (2) vs. (0), (1) vs. (0) |        |       |
|-------------------------|--------------------|------------------------|--------------------|------------------------|-------------|------------------------|-------------------------------------|-------------------------------------------------------------------------------|--------|-------|
|                         | n                  | mean (SD) <sup>a</sup> | n                  | mean (SD) <sup>a</sup> | n           | mean (SD) <sup>a</sup> |                                     |                                                                               |        |       |
| Spherical equivalent, D |                    |                        |                    |                        |             |                        |                                     |                                                                               |        |       |
| 0 month                 | 160                | 0.50 (0.33)            | 159                | 0.51 (0.33)            | 155         | 0.53 (0.31)            | 0.85                                | 0.93                                                                          | 0.59   | 0.66  |
| 2 weeks                 | 143                | 0.69 (0.39)            | 138                | 0.58 (0.41)            | 136         | 0.56 (0.34)            | <0.001                              | 0.01                                                                          | <0.001 | 0.003 |
| 4 months                | 138                | 0.66 (0.43)            | 127                | 0.50 (0.48)            | 130         | 0.38 (0.45)            | <0.001                              | <0.001                                                                        | <0.001 | 0.001 |
| 8 months                | 132                | 0.50 (0.47)            | 131                | 0.25 (0.56)            | 120         | 0.20 (0.58)            | <0.001                              | <0.001                                                                        | <0.001 | 0.03  |
| 12 months               | 136                | 0.39 (0.51)            | 139                | 0.12 (0.62)            | 128         | -0.01 (0.65)           | <0.001                              | <0.001                                                                        | <0.001 | 0.03  |
| 16 months               | 124                | 0.25 (0.65)            | 132                | -0.06 (0.75)           | 124         | -0.15 (0.73)           | <0.001                              | <0.001                                                                        | <0.001 | 0.07  |
| 20 months               | 95                 | 0.10 (0.76)            | 92                 | -0.19 (0.82)           | 88          | -0.28 (0.82)           | <0.001                              | 0.002                                                                         | <0.001 | 0.36  |
| 24 months               | 116                | 0.05 (0.76)            | 122                | -0.33 (0.92)           | 115         | -0.46 (0.90)           | <0.001                              | <0.001                                                                        | <0.001 | 0.18  |
| Axial length, mm        |                    |                        |                    |                        |             |                        |                                     |                                                                               |        |       |
| 0 month                 | 158                | 22.82 (0.72)           | 157                | 22.89 (0.70)           | 155         | 22.80 (0.64)           | 0.88                                | 0.85                                                                          | 0.75   | 0.62  |
| 2 weeks                 | 142                | 22.82 (0.73)           | 136                | 22.90 (0.71)           | 136         | 22.84 (0.66)           | 0.002                               | 0.38                                                                          | 0.001  | 0.005 |
| 4 months                | 138                | 22.90 (0.73)           | 126                | 22.99 (0.73)           | 129         | 22.94 (0.65)           | <0.001                              | 0.05                                                                          | <0.001 | 0.01  |
| 8 months                | 132                | 22.95 (0.73)           | 131                | 23.15 (0.70)           | 119         | 23.05 (0.68)           | <0.001                              | <0.001                                                                        | <0.001 | 0.04  |
| 12 months               | 136                | 23.05 (0.73)           | 139                | 23.24 (0.71)           | 126         | 23.19 (0.69)           | <0.001                              | <0.001                                                                        | <0.001 | 0.09  |
| 16 months               | 124                | 23.10 (0.71)           | 132                | 23.36 (0.76)           | 123         | 23.28 (0.69)           | <0.001                              | <0.001                                                                        | <0.001 | 0.20  |
| 20 months               | 95                 | 23.20 (0.71)           | 92                 | 23.47 (0.82)           | 98          | 23.38 (0.67)           | <0.001                              | 0.001                                                                         | 0.001  | 0.75  |
| 24 months               | 115                | 23.25 (0.71)           | 121                | 23.55 (0.81)           | 114         | 23.51 (0.73)           | <0.001                              | <0.001                                                                        | <0.001 | 0.33  |

a. Mean and SD were calculated with data from both eyes.

b. *P* values were generated by the generalized estimating equation model. Baseline spherical equivalent/axial length was compared with adjustment of baseline age, sex, outdoor time, near work, and parental myopia; spherical equivalent/axial length in other follow-up visits was compared with adjustment of baseline age, sex, baseline spherical equivalent/axial length, outdoor time, near work and parental myopia.

eTable 13. Changes in Spherical Equivalent and Axial Length over Two Years Using the Right or Left Eyes

| Using data from right eyes |                    |                           |                    |                           |             |                           |                                 |                                                                                             |        |       |
|----------------------------|--------------------|---------------------------|--------------------|---------------------------|-------------|---------------------------|---------------------------------|---------------------------------------------------------------------------------------------|--------|-------|
| Changes in                 | (2) 0.05% Atropine |                           | (1) 0.01% Atropine |                           | (0) Placebo |                           | <i>P</i> for trend <sup>a</sup> | <i>P</i> value <sup>a</sup> , pairwise comparisons<br>(2) vs. (1), (2) vs. (0), (1) vs. (0) |        |       |
| Spherical equivalent, D    | n                  | mean (95%CI)              | n                  | mean (95%CI)              | n           | mean (95%CI)              |                                 |                                                                                             |        |       |
| 2 weeks                    | 143                | 0.18<br>(0.14 to 0.23)    | 138                | 0.07<br>(0.03 to 0.11)    | 136         | 0.01<br>(-0.03 to 0.05)   | <0.001                          | 0.004                                                                                       | <0.001 | 0.03  |
| 4 months                   | 138                | 0.16<br>(0.11 to 0.22)    | 127                | -0.02<br>(-0.08 to 0.04)  | 130         | -0.15<br>(-0.21 to -0.09) | <0.001                          | 0.001                                                                                       | <0.001 | 0.002 |
| 8 months                   | 132                | -0.01<br>(-0.08 to 0.06)  | 131                | -0.25<br>(-0.33 to 0.18)  | 120         | -0.39<br>(-0.48 to -0.31) | <0.001                          | 0.001                                                                                       | <0.001 | 0.008 |
| 12 months                  | 136                | -0.12<br>(-0.20 to -0.04) | 139                | -0.40<br>(-0.49 to -0.31) | 128         | -0.55<br>(-0.65 to -0.45) | <0.001                          | <0.001                                                                                      | <0.001 | 0.04  |
| 16 months                  | 124                | -0.25<br>(-0.36 to -0.14) | 132                | -0.57<br>(-0.69 to -0.46) | 124         | -0.71<br>(-0.82 to -0.60) | <0.001                          | 0.001                                                                                       | <0.001 | 0.11  |
| 20 months                  | 95                 | -0.36<br>(-0.51 to -0.21) | 92                 | -0.73<br>(-0.89 to -0.57) | 88          | -0.86<br>(-1.01 to -0.70) | <0.001                          | 0.006                                                                                       | <0.001 | 0.41  |
| 24 months                  | 116                | -0.46<br>(-0.59 to -0.33) | 122                | -0.82<br>(-0.97 to -0.68) | 115         | -1.03<br>(-1.17 to -0.88) | <0.001                          | 0.002                                                                                       | <0.001 | 0.09  |
| Axial length, mm           |                    |                           |                    |                           |             |                           |                                 |                                                                                             |        |       |
| 2 weeks                    | 140                | 0.01<br>(0.00 to 0.02)    | 136                | 0.02<br>(0.01 to 0.03)    | 135         | 0.04<br>(0.03 to 0.06)    | <0.001                          | 0.56                                                                                        | <0.001 | 0.001 |
| 4 months                   | 137                | 0.07<br>(0.06 to 0.09)    | 125                | 0.12<br>(0.10 to 0.13)    | 129         | 0.16<br>(0.14 to 0.18)    | <0.001                          | 0.06                                                                                        | <0.001 | 0.007 |
| 8 months                   | 131                | 0.17<br>(0.14 to 0.19)    | 129                | 0.24<br>(0.21 to 0.27)    | 120         | 0.31<br>(0.27 to 0.34)    | <0.001                          | 0.006                                                                                       | <0.001 | 0.02  |
| 12 months                  | 135                | 0.25<br>(0.22 to 0.28)    | 137                | 0.34<br>(0.31 to 0.38)    | 127         | 0.41<br>(0.37 to 0.45)    | <0.001                          | 0.002                                                                                       | <0.001 | 0.07  |
| 16 months                  | 123                | 0.34<br>(0.29 to 0.38)    | 130                | 0.47<br>(0.42 to 0.52)    | 123         | 0.52<br>(0.47 to 0.56)    | <0.001                          | 0.001                                                                                       | <0.001 | 0.23  |
| 20 months                  | 94                 | 0.42<br>(0.36 to 0.48)    | 92                 | 0.57<br>(0.50 to 0.63)    | 87          | 0.61<br>(0.55 to 0.67)    | 0.001                           | 0.004                                                                                       | 0.001  | 0.61  |
| 24 months                  | 114                | 0.47<br>(0.42 to 0.53)    | 120                | 0.63<br>(0.57 to 0.69)    | 115         | 0.71<br>(0.64 to 0.77)    | <0.001                          | 0.002                                                                                       | <0.001 | 0.19  |
| Using data from left eyes  |                    |                           |                    |                           |             |                           |                                 |                                                                                             |        |       |
| Spherical equivalent, D    |                    |                           |                    |                           |             |                           |                                 |                                                                                             |        |       |
| 2 weeks                    | 143                | 0.16<br>(0.12 to 0.21)    | 138                | 0.10<br>(0.07 to 0.14)    | 136         | 0.01<br>(-0.02 to 0.05)   | <0.001                          | 0.08                                                                                        | <0.001 | 0.009 |

|                  |     |                           |     |                           |     |                           |        |        |        |       |
|------------------|-----|---------------------------|-----|---------------------------|-----|---------------------------|--------|--------|--------|-------|
| 4 months         | 138 | 0.17<br>(0.11 to 0.22)    | 127 | 0.00<br>(-0.06 to 0.05)   | 130 | -0.16<br>(-0.21 to -0.10) | <0.001 | <0.001 | <0.001 | 0.003 |
| 8 months         | 132 | 0.04<br>(-0.03 to 0.11)   | 131 | -0.23<br>(-0.30 to -0.16) | 120 | -0.34<br>(-0.44 to -0.25) | <0.001 | <0.001 | <0.001 | 0.09  |
| 12 months        | 136 | -0.10<br>(-0.17 to -0.02) | 139 | -0.36<br>(-0.44 to -0.28) | 128 | -0.54<br>(-0.65 to -0.44) | <0.001 | <0.001 | <0.001 | 0.02  |
| 16 months        | 124 | -0.25<br>(-0.35 to -0.15) | 132 | -0.54<br>(-0.65 to -0.44) | 124 | -0.68<br>(-0.79 to -0.56) | <0.001 | 0.002  | <0.001 | 0.09  |
| 20 months        | 95  | -0.39<br>(-0.53 to -0.25) | 92  | -0.68<br>(-0.83 to -0.54) | 88  | -0.81<br>(-0.96 to -0.66) | <0.001 | 0.009  | <0.001 | 0.37  |
| 24 months        | 116 | -0.45<br>(-0.58 to -0.33) | 122 | -0.85<br>(-1.00 to -0.70) | 115 | -0.99<br>(-1.14 to -0.84) | <0.001 | <0.001 | <0.001 | 0.39  |
| Axial length, mm |     |                           |     |                           |     |                           |        |        |        |       |
| 2 weeks          | 140 | 0.01<br>(0.00 to 0.02)    | 136 | 0.02<br>(0.01 to 0.02)    | 135 | 0.04<br>(0.03 to 0.05)    | 0.001  | 0.50   | 0.001  | 0.007 |
| 4 months         | 137 | 0.08<br>(0.06 to 0.11)    | 125 | 0.11<br>(0.09 to 0.13)    | 129 | 0.15<br>(0.13 to 0.18)    | <0.001 | 0.16   | <0.001 | 0.05  |
| 8 months         | 131 | 0.16<br>(0.14 to 0.19)    | 129 | 0.24<br>(0.21 to 0.27)    | 120 | 0.30<br>(0.26 to 0.34)    | <0.001 | 0.003  | <0.001 | 0.04  |
| 12 months        | 135 | 0.24<br>(0.21 to 0.27)    | 137 | 0.34<br>(0.30 to 0.37)    | 127 | 0.40<br>(0.35 to 0.44)    | <0.001 | 0.002  | <0.001 | 0.11  |
| 16 months        | 123 | 0.33<br>(0.29 to 0.37)    | 130 | 0.45<br>(0.41 to 0.50)    | 123 | 0.51<br>(0.46 to 0.56)    | <0.001 | 0.001  | <0.001 | 0.18  |
| 20 months        | 94  | 0.42<br>(0.36 to 0.48)    | 92  | 0.56<br>(0.50 to 0.63)    | 87  | 0.59<br>(0.52 to 0.66)    | 0.002  | 0.002  | 0.002  | 0.94  |
| 24 months        | 114 | 0.48<br>(0.42 to 0.54)    | 120 | 0.64<br>(0.57 to 0.70)    | 115 | 0.69<br>(0.62 to 0.76)    | <0.001 | 0.001  | <0.001 | 0.54  |

a. *P* values were generated by the linear regression model with the adjustment of baseline age, sex, baseline SE/AL, outdoor time, near work, and parental myopia.



eTable 14. Changes in Accommodation, Pupil Diameter, and Visual Acuity over Two Years

| Change in                  | (2) 0.05% Atropine        | (1) 0.01% Atropine        | (0) Placebo               | <i>P</i> for trend <sup>b</sup> | Overall <i>P</i> value <sup>b</sup> | <i>P</i> value, pairwise comparisons (2) vs. (1), (2) vs. (0), (1) vs. (0) |        |        |
|----------------------------|---------------------------|---------------------------|---------------------------|---------------------------------|-------------------------------------|----------------------------------------------------------------------------|--------|--------|
|                            | mean (95%CI) <sup>a</sup> | mean (95%CI) <sup>a</sup> | mean (95%CI) <sup>a</sup> |                                 |                                     |                                                                            |        |        |
| Accommodation amplitude, D |                           |                           |                           |                                 |                                     |                                                                            |        |        |
| 2 weeks                    | -3.61 (-4.03 to -3.19)    | -1.63 (-2.01 to -1.25)    | -0.69 (-1.08 to -0.30)    | <0.001                          | <0.001                              | <0.001                                                                     | <0.001 | 0.02   |
| 4 months                   | -1.97 (-2.39 to -1.55)    | -1.43 (-1.83 to -1.04)    | -0.69 (-1.08 to -0.29)    | 0.001                           | 0.006                               | 0.15                                                                       | 0.001  | 0.07   |
| 8 months                   | -1.99 (-2.39 to -1.60)    | -1.68 (-2.09 to -1.27)    | -0.94 (-1.40 to -0.48)    | 0.01                            | 0.05                                | 0.34                                                                       | 0.01   | 0.13   |
| 12 months                  | -2.00 (-2.49 to -1.52)    | -1.52 (-1.94 to -1.09)    | -1.29 (-1.80 to -0.78)    | 0.15                            | 0.30                                | 0.21                                                                       | 0.15   | 0.75   |
| 16 months                  | -2.60 (-3.07 to -2.13)    | -1.78 (-2.27 to -1.30)    | -1.43 (-1.96 to -0.90)    | 0.02                            | 0.04                                | 0.07                                                                       | 0.02   | 0.52   |
| 20 months                  | -3.46 (-4.00 to -2.91)    | -1.53 (-2.04 to -1.01)    | -1.65 (-2.28 to -1.03)    | 0.002                           | <0.001                              | <0.001                                                                     | 0.002  | 0.79   |
| 24 months                  | -3.17 (-3.72 to -2.62)    | -2.26 (-2.74 to -1.77)    | -2.12 (-2.64 to -1.60)    | 0.03                            | 0.05                                | 0.03                                                                       | 0.03   | 0.87   |
| Photopic pupil size, mm    |                           |                           |                           |                                 |                                     |                                                                            |        |        |
| 2 weeks                    | 1.39 (1.26 to 1.52)       | 0.56 (0.46 to 0.67)       | -0.13 (-0.23 to -0.02)    | <0.001                          | <0.001                              | <0.001                                                                     | <0.001 | <0.001 |
| 4 months                   | 1.32 (1.19 to 1.46)       | 0.54 (0.42 to 0.66)       | 0.00 (-0.11 to 0.11)      | <0.001                          | <0.001                              | <0.001                                                                     | <0.001 | <0.001 |
| 8 months                   | 1.15 (1.02 to 1.28)       | 0.47 (0.35 to 0.58)       | 0.01 (-0.12 to 0.13)      | <0.001                          | <0.001                              | <0.001                                                                     | <0.001 | <0.001 |
| 12 months                  | 1.16 (1.03 to 1.29)       | 0.39 (0.29 to 0.50)       | 0.17 (0.04 to 0.30)       | <0.001                          | <0.001                              | <0.001                                                                     | <0.001 | 0.03   |
| 16 months                  | 1.10 (0.97 to 1.24)       | 0.39 (0.28 to 0.50)       | 0.08 (-0.04 to 0.20)      | <0.001                          | <0.001                              | <0.001                                                                     | <0.001 | 0.004  |
| 20 months                  | 1.26 (1.11 to 1.41)       | 0.51 (0.38 to 0.65)       | 0.14 (-0.01 to 0.29)      | <0.001                          | <0.001                              | <0.001                                                                     | <0.001 | 0.003  |
| 24 months                  | 1.12 (0.99 to 1.25)       | 0.47 (0.36 to 0.59)       | 0.06 (-0.07 to 0.19)      | <0.001                          | <0.001                              | <0.001                                                                     | <0.001 | <0.001 |
| Mesopic pupil size, mm     |                           |                           |                           |                                 |                                     |                                                                            |        |        |
| 2 weeks                    | 0.75 (0.68 to 0.83)       | 0.40 (0.32 to 0.48)       | 0.04 (-0.03 to 0.12)      | <0.001                          | <0.001                              | <0.001                                                                     | <0.001 | <0.001 |
| 4 months                   | 0.79 (0.71 to 0.87)       | 0.43 (0.34 to 0.52)       | 0.12 (0.05 to 0.19)       | <0.001                          | <0.001                              | <0.001                                                                     | <0.001 | <0.001 |
| 8 months                   | 0.74 (0.66 to 0.82)       | 0.42 (0.34 to 0.50)       | 0.14 (0.06 to 0.22)       | <0.001                          | <0.001                              | <0.001                                                                     | <0.001 | <0.001 |
| 12 months                  | 0.78 (0.70 to 0.86)       | 0.44 (0.35 to 0.52)       | 0.18 (0.11 to 0.24)       | <0.001                          | <0.001                              | <0.001                                                                     | <0.001 | <0.001 |
| 16 months                  | 0.79 (0.71 to 0.88)       | 0.40 (0.32 to 0.48)       | 0.13 (0.06 to 0.21)       | <0.001                          | <0.001                              | <0.001                                                                     | <0.001 | <0.001 |
| 20 months                  | 0.81 (0.72 to 0.91)       | 0.40 (0.30 to 0.51)       | 0.12 (0.03 to 0.21)       | <0.001                          | <0.001                              | <0.001                                                                     | <0.001 | 0.001  |
| 24 months                  | 0.77 (0.69 to 0.86)       | 0.42 (0.34 to 0.51)       | 0.13 (0.05 to 0.21)       | <0.001                          | <0.001                              | <0.001                                                                     | <0.001 | <0.001 |
| Distance VA, logMAR        |                           |                           |                           |                                 |                                     |                                                                            |        |        |
| 2 weeks                    | 0.00 (0.00 to 0.01)       | 0.00 (-0.01 to 0.00)      | -0.01 (-0.01 to 0.00)     | 0.17                            | 0.38                                | 0.36                                                                       | 0.17   | 0.81   |
| 4 months                   | 0.00 (-0.01 to 0.00)      | -0.01 (-0.02 to 0.00)     | -0.01 (-0.01 to 0.00)     | 0.48                            | 0.71                                | 0.45                                                                       | 0.51   | 0.82   |
| 8 months                   | -0.01 (-0.02 to 0.00)     | -0.01 (-0.02 to 0.00)     | -0.02 (-0.02 to -0.01)    | 0.73                            | 0.79                                | 0.82                                                                       | 0.68   | 0.51   |
| 12 months                  | -0.02 (-0.03 to -0.01)    | -0.02 (-0.03 to -0.01)    | -0.03 (-0.04 to -0.02)    | 0.49                            | 0.76                                | 0.90                                                                       | 0.48   | 0.56   |
| 16 months                  | -0.04 (-0.04 to -0.03)    | -0.04 (-0.04 to -0.03)    | -0.04 (-0.05 to -0.03)    | 0.32                            | 0.49                                | 0.99                                                                       | 0.31   | 0.31   |
| 20 months                  | -0.04 (-0.05 to -0.03)    | -0.04 (-0.05 to -0.03)    | -0.05 (-0.06 to -0.04)    | 0.15                            | 0.35                                | 0.63                                                                       | 0.15   | 0.40   |
| 24 months                  | -0.05 (-0.06 to -0.04)    | -0.05 (-0.07 to -0.04)    | -0.05 (-0.06 to -0.04)    | 0.85                            | 0.97                                | 0.80                                                                       | 0.86   | 0.94   |
| Near VA, logMAR            |                           |                           |                           |                                 |                                     |                                                                            |        |        |
| 2 weeks                    | 0.01 (0.00 to 0.02)       | 0.00 (-0.01 to 0.01)      | 0.00 (-0.01 to 0.01)      | 0.70                            | 0.35                                | 0.18                                                                       | 0.70   | 0.30   |

|           |                        |                        |                        |      |      |      |      |      |
|-----------|------------------------|------------------------|------------------------|------|------|------|------|------|
| 4 months  | -0.01 (-0.02 to 0.00)  | -0.02 (-0.03 to -0.01) | -0.01 (-0.02 to 0.00)  | 0.82 | 0.83 | 0.68 | 0.81 | 0.55 |
| 8 months  | -0.02 (-0.03 to 0.00)  | -0.02 (-0.03 to -0.01) | -0.01 (-0.02 to 0.00)  | 0.50 | 0.40 | 0.48 | 0.48 | 0.18 |
| 12 months | -0.02 (-0.04 to -0.01) | -0.03 (-0.04 to -0.02) | -0.02 (-0.04 to -0.01) | 0.21 | 0.23 | 0.66 | 0.20 | 0.09 |
| 16 months | -0.03 (-0.04 to -0.01) | -0.03 (-0.04 to -0.02) | -0.02 (-0.04 to -0.01) | 0.50 | 0.60 | 0.78 | 0.50 | 0.32 |
| 20 months | -0.03 (-0.05 to -0.02) | -0.04 (-0.06 to -0.03) | -0.03 (-0.04 to -0.01) | 0.55 | 0.42 | 0.40 | 0.53 | 0.19 |
| 24 months | -0.03 (-0.05 to -0.02) | -0.04 (-0.05 to -0.03) | -0.03 (-0.04 to -0.01) | 0.46 | 0.45 | 0.57 | 0.46 | 0.21 |

a. Mean and 95%CI were calculated with data from both eyes.

b. *P* values were generated by the generalized estimating equation model with the adjustment of baseline age and sex.

eTable 15. Accommodation, Pupil Diameter, and Visual Acuity at Follow-Up Visits over Two years

| Accommodation amplitude, D | (2) 0.05% Atropine mean (SD) <sup>a</sup> | (1) 0.01% Atropine mean (SD) <sup>a</sup> | (0) Placebo mean (SD) <sup>a</sup> | Overall <i>P</i> value <sup>b</sup> | <i>P</i> value, pairwise comparisons (2) vs. (1), (2) vs. (0), (1) vs. (0) |        |        |
|----------------------------|-------------------------------------------|-------------------------------------------|------------------------------------|-------------------------------------|----------------------------------------------------------------------------|--------|--------|
|                            |                                           |                                           |                                    |                                     |                                                                            |        |        |
| 0 month                    | 13.34 (2.69)                              | 13.60 (2.67)                              | 13.33 (2.74)                       | 0.59                                | 0.39                                                                       | 0.95   | 0.36   |
| 2 weeks                    | 9.66 (3.03)                               | 11.96 (2.78)                              | 12.63 (2.96)                       | <0.001                              | <0.001                                                                     | <0.001 | 0.03   |
| 4 months                   | 11.31 (2.92)                              | 12.29 (2.89)                              | 12.58 (2.74)                       | 0.001                               | 0.01                                                                       | <0.001 | 0.26   |
| 8 months                   | 11.34 (2.76)                              | 11.89 (2.88)                              | 12.45 (3.18)                       | 0.02                                | 0.11                                                                       | 0.004  | 0.19   |
| 12 months                  | 11.36 (3.12)                              | 12.15 (3.15)                              | 12.01 (3.51)                       | 0.08                                | 0.03                                                                       | 0.12   | 0.76   |
| 16 months                  | 10.75 (3.06)                              | 11.95 (3.27)                              | 11.93 (3.14)                       | 0.002                               | 0.002                                                                      | 0.004  | 0.91   |
| 20 months                  | 10.17 (3.02)                              | 11.94 (3.18)                              | 11.68 (3.05)                       | <0.001                              | <0.001                                                                     | 0.001  | 0.61   |
| 24 months                  | 10.28 (2.90)                              | 11.28 (3.33)                              | 11.15 (2.96)                       | 0.005                               | 0.003                                                                      | 0.01   | 0.71   |
| Photopic pupil size, mm    |                                           |                                           |                                    |                                     |                                                                            |        |        |
| 0 month                    | 3.55 (0.57)                               | 3.57 (0.61)                               | 3.69 (0.72)                        | 0.14                                | 0.69                                                                       | 0.05   | 0.13   |
| 2 weeks                    | 4.95 (1.02)                               | 4.18 (0.72)                               | 3.50 (0.53)                        | <0.001                              | <0.001                                                                     | <0.001 | <0.001 |
| 4 months                   | 4.91 (0.96)                               | 4.10 (0.75)                               | 3.66 (0.69)                        | <0.001                              | <0.001                                                                     | <0.001 | <0.001 |
| 8 months                   | 4.71 (0.90)                               | 4.04 (0.69)                               | 3.64 (0.69)                        | <0.001                              | <0.001                                                                     | <0.001 | <0.001 |
| 12 months                  | 4.67 (0.91)                               | 3.98 (0.62)                               | 3.77 (0.76)                        | <0.001                              | <0.001                                                                     | <0.001 | 0.04   |
| 16 months                  | 4.66 (0.86)                               | 3.96 (0.65)                               | 3.71 (0.76)                        | <0.001                              | <0.001                                                                     | <0.001 | 0.01   |
| 20 months                  | 4.80 (0.86)                               | 4.05 (0.69)                               | 3.72 (0.79)                        | <0.001                              | <0.001                                                                     | <0.001 | 0.007  |
| 24 months                  | 4.62 (0.84)                               | 4.05 (0.72)                               | 3.72 (0.82)                        | <0.001                              | <0.001                                                                     | <0.001 | 0.001  |
| Mesopic pupil size, mm     |                                           |                                           |                                    |                                     |                                                                            |        |        |
| 0 month                    | 6.36 (0.68)                               | 6.34 (0.74)                               | 6.53 (0.74)                        | 0.04                                | 0.76                                                                       | 0.04   | 0.02   |
| 2 weeks                    | 7.13 (0.65)                               | 6.76 (0.57)                               | 6.53 (0.64)                        | <0.001                              | <0.001                                                                     | <0.001 | <0.001 |
| 4 months                   | 7.17 (0.63)                               | 6.70 (0.57)                               | 6.66 (0.71)                        | <0.001                              | <0.001                                                                     | <0.001 | 0.003  |
| 8 months                   | 7.10 (0.63)                               | 6.76 (0.52)                               | 6.65 (0.65)                        | <0.001                              | <0.001                                                                     | <0.001 | 0.001  |
| 12 months                  | 7.14 (0.68)                               | 6.75 (0.55)                               | 6.70 (0.65)                        | <0.001                              | <0.001                                                                     | <0.001 | 0.003  |
| 16 months                  | 7.16 (0.61)                               | 6.73 (0.53)                               | 6.64 (0.65)                        | <0.001                              | <0.001                                                                     | <0.001 | 0.001  |
| 20 months                  | 7.21 (0.58)                               | 6.68 (0.60)                               | 6.69 (0.72)                        | <0.001                              | <0.001                                                                     | <0.001 | 0.07   |
| 24 months                  | 7.15 (0.61)                               | 6.74 (0.53)                               | 6.64 (0.71)                        | <0.001                              | <0.001                                                                     | <0.001 | 0.002  |
| Distance VA, logMAR        |                                           |                                           |                                    |                                     |                                                                            |        |        |
| 0 month                    | 0.03 (0.10)                               | 0.02 (0.09)                               | 0.02 (0.07)                        | 0.37                                | 0.29                                                                       | 0.17   | 0.88   |
| 2 weeks                    | 0.03 (0.07)                               | 0.02 (0.09)                               | 0.02 (0.07)                        | 0.08                                | 0.15                                                                       | 0.03   | 0.72   |
| 4 months                   | 0.03 (0.08)                               | 0.01 (0.08)                               | 0.02 (0.07)                        | 0.21                                | 0.12                                                                       | 0.14   | 0.78   |
| 8 months                   | 0.02 (0.08)                               | 0.01 (0.07)                               | 0.01 (0.07)                        | 0.63                                | 0.61                                                                       | 0.34   | 0.65   |
| 12 months                  | 0.01 (0.08)                               | 0.00 (0.07)                               | 0.00 (0.07)                        | 0.37                                | 0.31                                                                       | 0.18   | 0.70   |
| 16 months                  | 0.00 (0.07)                               | -0.02 (0.08)                              | -0.01 (0.07)                       | 0.23                                | 0.41                                                                       | 0.09   | 0.39   |

|                 |              |              |              |      |      |      |      |
|-----------------|--------------|--------------|--------------|------|------|------|------|
| 20 months       | -0.01 (0.07) | -0.01 (0.08) | -0.02 (0.06) | 0.19 | 0.68 | 0.07 | 0.22 |
| 24 months       | -0.02 (0.08) | -0.03 (0.08) | -0.03 (0.07) | 0.56 | 0.29 | 0.51 | 0.68 |
| Near VA, logMAR |              |              |              |      |      |      |      |
| 0 month         | 0.04 (0.10)  | 0.03 (0.10)  | 0.02 (0.09)  | 0.07 | 0.40 | 0.02 | 0.16 |
| 2 weeks         | 0.05 (0.08)  | 0.02 (0.09)  | 0.03 (0.09)  | 0.07 | 0.03 | 0.07 | 0.60 |
| 4 months        | 0.03 (0.10)  | 0.01 (0.09)  | 0.02 (0.08)  | 0.31 | 0.16 | 0.24 | 0.82 |
| 8 months        | 0.04 (0.08)  | 0.01 (0.07)  | 0.02 (0.08)  | 0.07 | 0.02 | 0.47 | 0.21 |
| 12 months       | 0.02 (0.07)  | 0.00 (0.07)  | 0.01 (0.07)  | 0.20 | 0.14 | 0.94 | 0.13 |
| 16 months       | 0.02 (0.09)  | 0.00 (0.07)  | 0.01 (0.07)  | 0.48 | 0.28 | 0.83 | 0.33 |
| 20 months       | 0.01 (0.07)  | -0.01 (0.07) | 0.00 (0.09)  | 0.56 | 0.31 | 0.96 | 0.43 |
| 24 months       | 0.01 (0.08)  | 0.00 (0.07)  | 0.00 (0.06)  | 0.28 | 0.12 | 0.53 | 0.31 |

a. Mean and SD were calculated with data from both eyes.

b. *P* values were generated by the generalized estimating equation model. The baseline variable was compared with adjustment of baseline age and sex; Variables in other follow-up visits were compared with adjustment of baseline age, sex, and corresponding baseline factor.

eTable 16. Adverse Events over Two Years

|                              | First year     |                |            | Second year    |                |            |
|------------------------------|----------------|----------------|------------|----------------|----------------|------------|
|                              | 0.05% Atropine | 0.01% Atropine | Placebo    | 0.05% Atropine | 0.01% Atropine | Placebo    |
| Photochromic glasses needed  | 0 (0.0%)       | 1 (0.7%)       | 0 (0.0%)   | 0 (0.0%)       | 2 (1.6%)       | 2 (1.7%)   |
| Progressive glasses needed   | 0 (0.0%)       | 0 (0.0%)       | 1 (0.8%)   | 0 (0.0%)       | 1 (0.8%)       | 0 (0.0%)   |
| Photophobia                  | 28 (20.6%)     | 29 (20.9%)     | 13 (10.2%) | 15 (12.9%)     | 23 (18.9%)     | 14 (12.2%) |
| Allergic conjunctivitis      | 5 (3.7%)       | 7 (5.0%)       | 8 (6.3%)   | 5 (4.3%)       | 3 (2.5%)       | 2 (1.7%)   |
| Hospitalization <sup>a</sup> | 1 (0.7%)       | 5 (3.6%)       | 2 (1.6%)   | 5 (4.3%)       | 2 (1.6%)       | 1 (0.9%)   |

a. Hospitalization was not related to the medication. In the 0.05% atropine group, there were 2 cases of respiratory infections, 1 case of pneumonias, 1 case of fever, 1 case of sore throat, and 1 case of COVID-19. In the 0.01% atropine group, there were 4 cases of fever, 1 case of a sprain, 1 case of bone fractures, and 1 case of respiratory infection. In the placebo group, there was 1 case of fever, 1 case of gastroenteritis, and 1 case of asthma.

eTable 17. Visual Function Questionnaire Scores over Two Years

|                     | 0.05% Atropine        |                         |                          | 0.01% Atropine        |                         |                          | Placebo               |                         |                          | <i>P</i> value <sup>a</sup> |               |                |
|---------------------|-----------------------|-------------------------|--------------------------|-----------------------|-------------------------|--------------------------|-----------------------|-------------------------|--------------------------|-----------------------------|---------------|----------------|
|                     | Baseline<br>Mean (SD) | First-year<br>Mean (SD) | Second year<br>Mean (SD) | Baseline<br>Mean (SD) | First-year<br>Mean (SD) | Second year<br>Mean (SD) | Baseline<br>Mean (SD) | First-year<br>Mean (SD) | Second year<br>Mean (SD) | Baseline                    | First<br>year | Second<br>year |
| General health      | 78.60 (13.57)         | 80.02 (12.90)           | 79.14 (13.63)            | 77.65 (15.29)         | 76.03 (14.49)           | 77.95 (12.73)            | 77.71 (14.32)         | 78.62 (15.24)           | 76.92 (15.91)            | 0.82                        | 0.07          | 0.52           |
| General vision      | 84.83 (9.77)          | 85.88 (9.50)            | 84.10 (10.51)            | 83.75 (11.37)         | 83.36 (10.14)           | 83.54 (9.95)             | 85.11 (11.16)         | 83.70 (10.91)           | 84.31 (11.94)            | 0.52                        | 0.10          | 0.87           |
| Ocular pain         | 92.42 (12.53)         | 91.89 (13.12)           | 92.45 (11.50)            | 92.19 (13.09)         | 90.65 (12.70)           | 91.98 (13.79)            | 90.58 (14.60)         | 92.42 (11.78)           | 92.25 (13.72)            | 0.45                        | 0.51          | 0.97           |
| Near activities     | 96.53 (8.77)          | 96.85 (7.77)            | 97.09 (7.61)             | 96.03 (8.65)          | 96.38 (8.05)            | 96.54 (7.77)             | 96.28 (7.48)          | 97.09 (6.92)            | 96.30 (7.22)             | 0.87                        | 0.75          | 0.73           |
| Distance activities | 97.11 (8.58)          | 97.07 (7.71)            | 98.11 (5.99)             | 95.45 (9.04)          | 96.76 (6.41)            | 96.62 (6.47)             | 96.24 (7.79)          | 97.38 (7.01)            | 96.06 (7.23)             | 0.24                        | 0.78          | 0.07           |
| Social functioning  | 99.08 (5.24)          | 98.86 (5.68)            | 99.06 (5.63)             | 98.03 (7.06)          | 98.86 (4.50)            | 99.65 (2.70)             | 98.24 (6.59)          | 98.13 (7.22)            | 98.73 (4.49)             | 0.31                        | 0.53          | 0.31           |
| Mental health       | 92.92 (12.24)         | 92.70 (11.56)           | 92.14 (10.01)            | 92.64 (12.40)         | 93.08 (7.94)            | 91.69 (9.80)             | 92.25 (11.53)         | 92.18 (10.25)           | 92.65 (8.93)             | 0.90                        | 0.77          | 0.76           |
| Role difficulties   | 94.42 (14.74)         | 94.47 (15.79)           | 93.33 (15.76)            | 93.67 (16.96)         | 95.90 (9.72)            | 96.23 (10.06)            | 93.05 (17.07)         | 94.19 (15.14)           | 95.02 (11.43)            | 0.77                        | 0.57          | 0.25           |
| Dependency          | 96.94 (13.77)         | 96.69 (12.41)           | 96.35 (12.62)            | 97.26 (10.88)         | 97.65 (8.89)            | 95.99 (10.90)            | 97.30 (12.85)         | 97.18 (10.90)           | 97.92 (8.28)             | 0.97                        | 0.78          | 0.38           |
| Color vision        | 99.16 (5.37)          | 98.84 (9.28)            | 99.29 (5.42)             | 98.51 (6.60)          | 98.62 (6.52)            | 99.52 (3.43)             | 98.57 (7.20)          | 98.76 (7.79)            | 99.30 (4.14)             | 0.63                        | 0.98          | 0.91           |
| Peripheral vision   | 98.17 (8.24)          | 98.47 (6.75)            | 98.35 (7.11)             | 97.04 (9.51)          | 96.76 (8.42)            | 98.10 (7.49)             | 97.54 (8.05)          | 98.03 (7.44)            | 98.61 (6.68)             | 0.53                        | 0.17          | 0.87           |
| VFQ-25 composite    | 93.65 (7.18)          | 93.78 (6.47)            | 93.57 (6.65)             | 92.93 (7.75)          | 93.06 (5.37)            | 93.43 (5.63)             | 92.97 (7.14)          | 93.40 (6.70)            | 93.45 (5.66)             | 0.64                        | 0.64          | 0.98           |

a. *P* values were generated by the analysis of variance (ANOVA) test.

eFigure 1. Bar Graph Showing the Distribution of the Various Rates of Spherical Equivalent Myopic Shifts over Two Years in the 0.05% Atropine, 0.01% Atropine and Placebo Groups

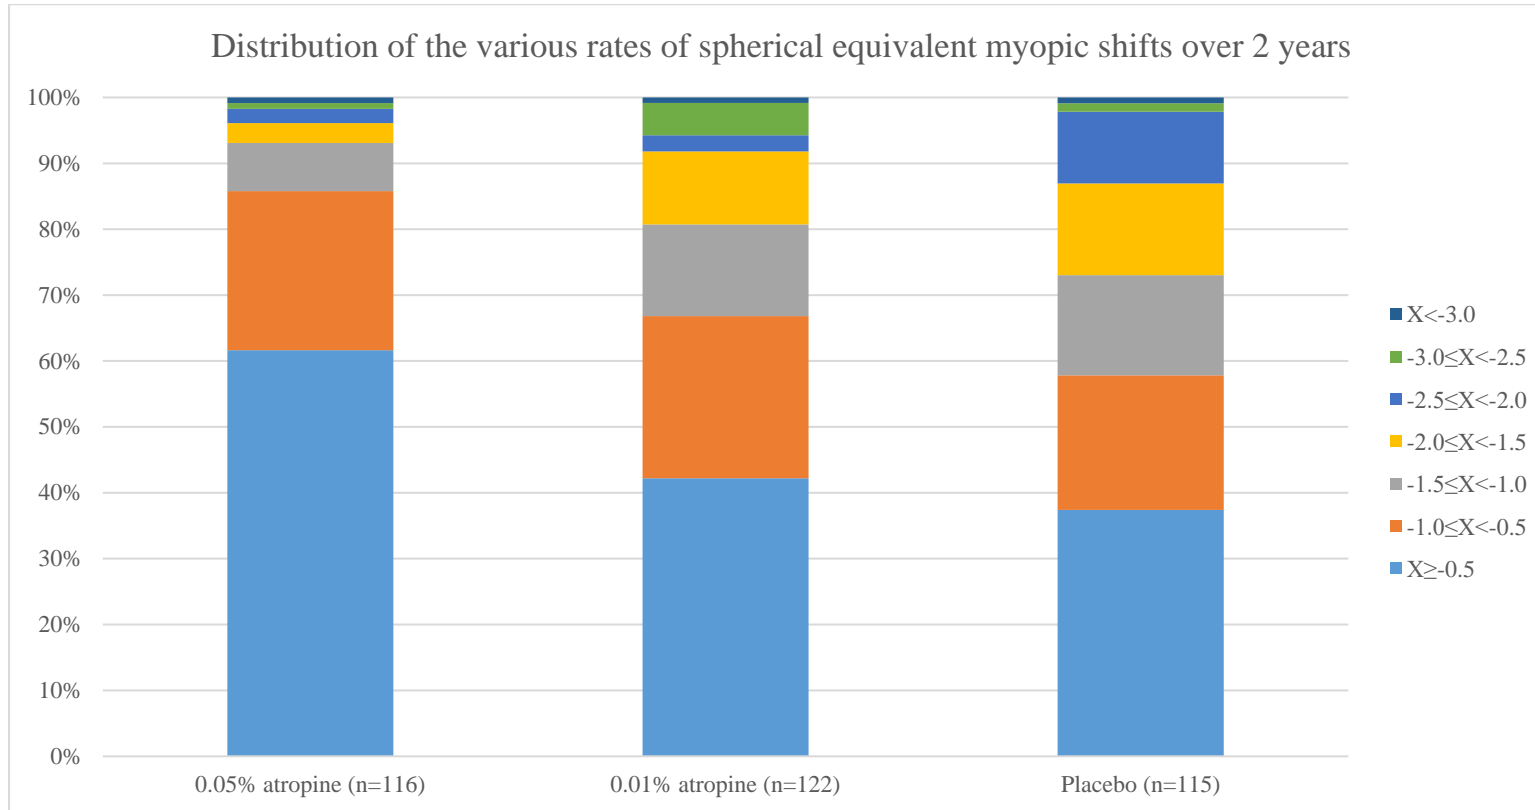

### Distribution of the various rates of axial length elongation over 2 years

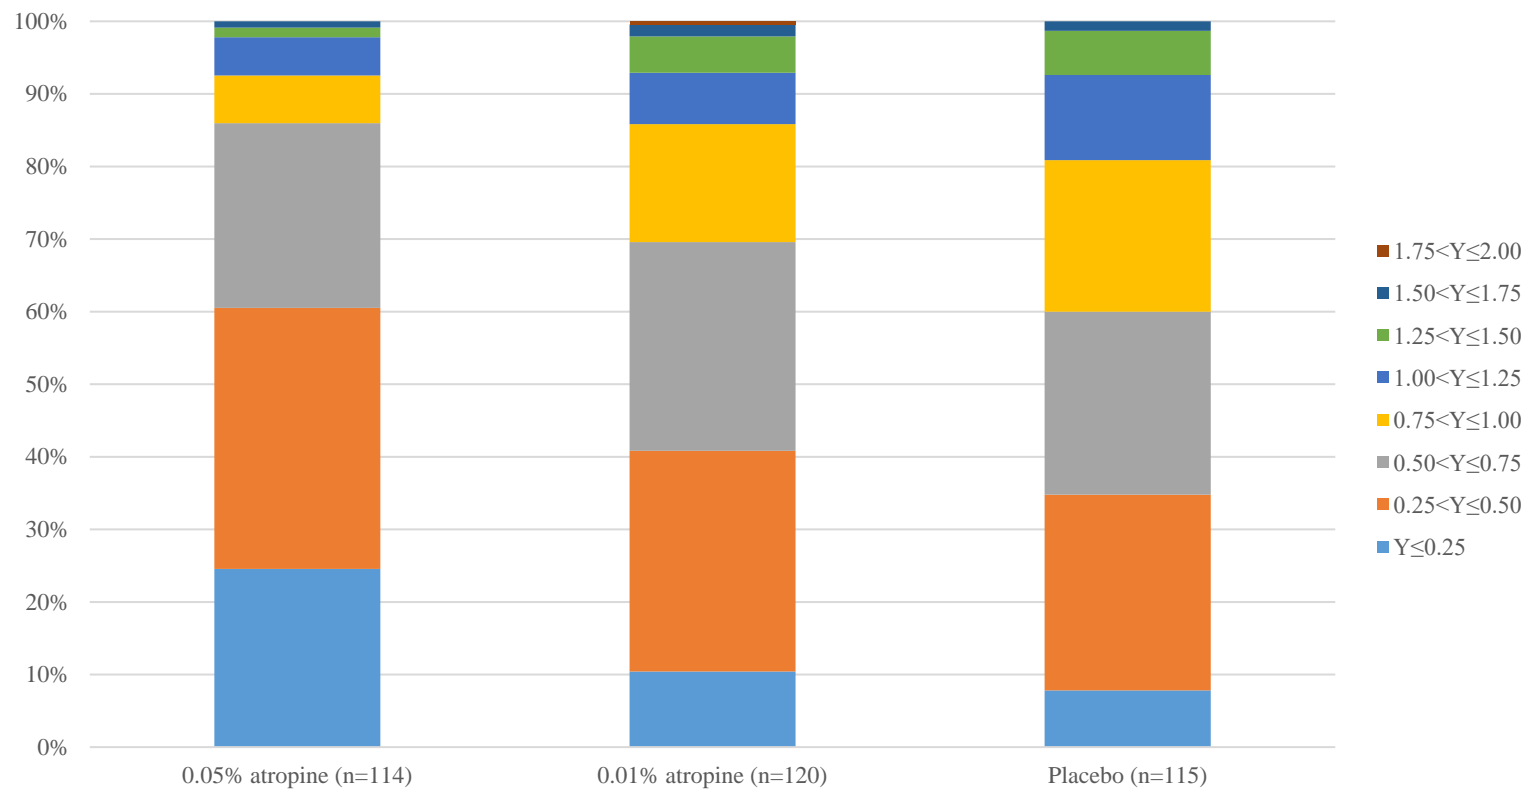

The analyses were based on the participants who completed the 2-year follow-up.

X represents the change in spherical equivalent (D) over 2-year follow-up; Y represents the change in axial length (mm) over 2-year follow-up.
