# Supplementary material
Source: PubMed Central journal article supplement (PMC9929700)
Supplement: jama-e2224162-s004.pdf [file jama-e2224162-s004.pdf]

## **Data Sharing Statement**

### **Data**

**Data available:** Yes

**Data types:** Deidentified participant data

**How to access data:** Data pertinent to this study will be made available upon request for researchers whose proposed use of the data has been approved by the Department of Ophthalmology and Visual Sciences

**When available:** With publication

### **Supporting Documents**

**Document types:** None

### **Additional Information**

**Who can access the data:** Researchers whose proposed use of the data has been approved

**Types of analyses:** For any purposes

**Mechanisms of data availability:** After approval of a proposal and with a signed data use agreement
